## 1 **CHIP ubiquitin ligase is involved in the nucleolar stress management**

2  
3 Authors: Malgorzata Piechota<sup>1\*</sup>, Lilla Biriczova<sup>1†</sup>, Konrad Kowalski<sup>1†</sup>, Natalia A.  
4 Szulc<sup>1</sup>, Wojciech Pokrzywa<sup>1\*</sup>

5  
6 <sup>1</sup>Laboratory of Protein Metabolism, International Institute of Molecular and Cell  
7 Biology in Warsaw, Poland

8  
9 \* Correspondence should be directed to:

10 WP: [wpokrzywa@iimcb.gov.pl](mailto:wpokrzywa@iimcb.gov.pl)

11 MP: [mpiechota@iimcb.gov.pl](mailto:mpiechota@iimcb.gov.pl)

12  
13 † These authors contributed equally to this work  
14

### 15 **ABSTRACT**

16 The nucleolus is a dynamic nuclear biomolecular condensate involved in cellular  
17 stress response. Under proteotoxic stress, the nucleolus can store damaged proteins  
18 for refolding or degradation. HSP70 chaperone is a well-documented player in the  
19 recovery process of proteins accumulated in the nucleolus after heat shock.  
20 However, little is known about the involvement of the ubiquitin-proteasome system in  
21 the turnover of its nucleolar clients. Here we show that HSP70, independently of its  
22 ATPase activity, promotes migration of the CHIP (carboxyl terminus of HSC70-  
23 interacting protein) ubiquitin ligase into the granular component of the nucleolus,  
24 specifically after heat stress. We show that while in the nucleolus, CHIP retains  
25 mobility that depends on its ubiquitination activity. Furthermore, after prolonged  
26 exposure to heat stress, CHIP self-organizes into large, intra-nucleolar droplet-like  
27 structures whose size is determined by CHIP ubiquitination capacity. Using a heat-  
28 sensitive nucleolar protein luciferase, we show that excess CHIP impairs its  
29 regeneration, probably through deregulation of HSP70. Our results demonstrate a  
30 novel role for CHIP in managing nucleolar proteostasis in response to stress.

### 31 **KEYWORDS**

32  
33  
34 nucleolus; heat stress; proteostasis; CHIP; HSP70  
35

### 36 **INTRODUCTION**

37  
38 The nucleolus is the largest subnuclear compartment formed by immiscible liquid  
39 phases that control ribosome biogenesis and translational capacity (Feric et al.,  
40 2016). It consists of three distinct layers: the fibrillar center (FC), dense fibrillar  
41 component (DFC) and granular component (GC), which surrounds FC and DFC, and  
42 the perinucleolar compartment (PNC) (Biggiogera et al., 1990; Feric et al., 2016). FC-  
43 DFC interface is a site where ribosomal DNA (rDNA) is actively transcribed, while  
44 DFC contains proteins such as fibrillarin, which are essential for rDNA processing  
45 (Jordan, 1984; Scheer and Hock, 1999; Smirnov et al., 2014; Lafontaine et al., 2021).  
46 GC is abundant in nucleophosmin (NPM1) and nucleolin proteins (Biggiogera et al.,  
47 1990) and acts as a site of ribosome subunits assembly (Feric et al., 2016; Kozakai  
48 et al., 2016; Mitrea et al., 2018). In addition, the nucleolus can serve as a safe harbor

49 for proteins after exposure to environmental stimuli or stress factors. For example,  
50 labile proteins during heat stress are transported into the nucleolus, where the heat  
51 shock protein 70 (HSP70) protects them from aggregation and facilitates their  
52 extraction and refolding after stress (Nollen et al., 2001; Frottin et al., 2019). Thus,  
53 the HSP70 chaperone is essential for the maintenance of nucleolar proteostasis.  
54 Recent proteomic analysis of the nucleolus from heat-shock treated cells identified  
55 numerous proteins accumulating in nucleoli among which several belonged to the  
56 ubiquitin-proteasome system (UPS) (Azkanaz et al., 2019). UPS regulates various  
57 cellular pathways by removing unwanted and damaged proteins marked by a small  
58 protein – ubiquitin (Ub). Its attachment is mediated by the Ub-activating enzymes  
59 (E1), Ub-conjugating enzymes (E2), and Ub ligases (E3) that select target proteins.  
60 In most cases, the proteasome subsequently degrades ubiquitinated proteins  
61 (Komander, 2009; Buetow and Huang, 2016). However, little is known about the  
62 involvement of the UPS in nucleolar stress response and proteostasis maintenance.  
63 Recent studies identified numerous proteins bound to NPM1 after heat shock (Frottin  
64 et al., 2019). Their accumulation was transient, only under heat shock, and HSP70  
65 activity was required for their dissociation from NPM1 during recovery (Frottin et al.,  
66 2019). Interestingly, several E3 ligases were detected in the aforementioned study,  
67 but further investigation of their nucleolar functions was not carried out. One of these  
68 was the quality control E3 ligase CHIP (C-terminus of Hsc70-interacting protein), the  
69 well-known HSP70 interactor. CHIP contains three tandem tetratricopeptide repeat  
70 (TPR) motifs that bind to the HSP70 and HSP90 chaperones and the catalytic U-box  
71 domain responsible for substrate ubiquitination (Ballinger et al., 1999; Jiang et al.,  
72 2001). Early work showed that heat-treated CHIP retains its ubiquitination activity  
73 and can modify substrates bound to HSP70/HSC70 (Ballinger et al., 1999; Meacham  
74 et al., 2001; Murata et al., 2001; Shimura et al., 2004; Tateishi et al., 2004; Younger  
75 et al., 2004; Stankiewicz et al., 2010). In addition, CHIP can control HSP70 levels in  
76 the client-free state through ubiquitination or by activating the transcription factor  
77 HSF1, a key regulator of the heat shock response (HSR) in eukaryotic cells (Dai et  
78 al., 2003; Qian et al., 2006). In mouse fibroblasts where CHIP was knocked out,  
79 heat-induced HSP70 activation was significantly reduced. On the other hand, its  
80 turnover rate also decreased, indicating that HSP70 and CHIP closely collaborate on  
81 degrading the chaperone's substrates, and their interaction is also self-regulatory  
82 (Dai et al., 2003; Qian et al., 2006). However, it is unclear what is the role of CHIP  
83 while in the nucleolus and whether it also cooperates with HSP70 in maintaining  
84 nucleolar proteostasis during heat stress and recovery.

85  
86 Here we show that heat shock-induced CHIP migration to nucleoli depends on  
87 HSP70 presence but not its activity. Nevertheless, functional HSP70 is essential for  
88 the release of CHIP from the nucleolus. We also noted that nucleolar CHIP could  
89 exhibit ubiquitination activity during heat stress and recovery. Specifically, CHIP is  
90 recruited to the GC compartment where it acts as a non-aggregating protein;  
91 however, its mobility becomes significantly limited when deprived of ubiquitination  
92 ability. Remarkably, CHIP localizes to specific condensates generated in the  
93 nucleolus under prolonged heat stress and whose dynamics depend on its E3  
94 activity. To this end, we used luciferase as a stress-sensitive model protein sorted to  
95 the nucleolus during heat shock and observed that CHIP hinders its regeneration,  
96 likely in collaboration with HSP70. Our results provide the groundwork for further  
97 studies on CHIP function in a nucleolar heat stress response.

98

## 99 RESULTS

### 100 101 **CHIP translocates to nucleoli in heat-stressed cells**

102  
103 To investigate the localization and function of CHIP in heat-stressed cells, we  
104 established two cell lines, based on the Flp-In system compatible HeLa and HEK-293  
105 cells (Szczyzny et al., 2018), stably overexpressing CHIP tagged with the EGFP  
106 fluorescent marker (hereafter HeLa EGFP-CHIP and HEK EGFP-CHIP cells) (Fig.  
107 S1A). In the experiment we exposed cells to heat shock at 42°C for 90 min, followed  
108 by recovery period at 37°C for 2 h (Fig. 1A). We found that EGFP-CHIP localized to  
109 nucleoli in both cell lines, specifically during heat shock, and abandoned it upon  
110 recovery (Fig.1B, Fig. S1B). None of the other tested stressors, such as arsenite,  
111 sorbitol, thapsigargin, or puromycin, induced CHIP migration into the nucleolus (Fig.  
112 S1B). We further confirmed the ability of CHIP to translocate into nucleoli in MCF7  
113 breast cancer cells transiently transfected with EGFP-CHIP (Fig. S1C). Importantly,  
114 endogenous CHIP also accumulated in the nucleolus after heat shock in HeLa Flp-In  
115 and MCF7 cells (Fig. 1C and S1D), indicating that CHIP translocation to the  
116 nucleolus is not an artifact resulting from EGFP tagged protein overexpression.  
117 Quantification of endogeneous CHIP intensities across nuclei and nucleoli in MCF7  
118 cells confirmed its increased nucleolar localization during heat stress (Fig. S1E).

119  
120 Next, we fractionated HeLa Flp-In cells into cytoplasmic, nucleoplasmic, and  
121 nucleolar fractions to verify CHIP translocation into nucleoli. Consistent with our  
122 imaging data, we found elevated CHIP levels in the nucleolar fractions of heat-  
123 stressed cells (Fig. 1D). Importantly, we also detected elevated levels of HSP70  
124 chaperone in nucleolar fractions after heat shock, which is consistent with previous  
125 reports (Pelham et al., 1984; Pelham, 1984; Welch and Feramisco, 1984; Welch and  
126 Suhan, 1986; Nollen et al., 2001; Azkanaz et al., 2019; Frottin et al., 2019). Following  
127 the suggestion that HSP70 may enter nucleoli in complex with other proteins (Frottin  
128 et al., 2019), we determined whether it modulates CHIP translocation into nucleoli.  
129 To verify this, we examined the transport of the CHIP K30A mutant, which is deficient  
130 in HSP70 binding. Indeed, HeLa Flp-In cells transiently transfected with the EGFP-  
131 CHIP K30A mutant exhibited impaired CHIP migration to nucleoli after heat shock  
132 (Fig. 1E). Therefore, we further aimed to determine the role of HSP70 in CHIP  
133 nucleolar localization.

### 134 135 **HSP70-dependent localization of CHIP in nucleoli**

136  
137 HSP70 colocalizes with CHIP in the nucleoli of heat-treated HeLa EGFP-CHIP cells,  
138 suggesting their functional cooperation (Fig. 2A). To examine the role of HSP70 in  
139 nucleolar CHIP accumulation, we lowered the HSP70 level via siRNA silencing in  
140 HeLa EGFP-CHIP cells (Fig. S2A) and applied our heat shock scheme (Fig. 1A). We  
141 observed reduced CHIP migration to the nucleoli in these cells (Fig. 2B).  
142 Furthermore, depleting HSP70 hindered CHIP exit from nucleoli during regeneration  
143 where 2 h post-heat shock more than 60% of cells still maintained CHIP in nucleoli,  
144 compared to approximately 10% of control cells (Fig. 2B and 2C).

145  
146 We next monitored CHIP localization during heat shock and recovery in the presence  
147 of VER-155008 (hereafter VER), a small molecule inhibitor of HSP70, to test whether  
148 HSP70 activity is required for CHIP translocation to nucleoli. Notably, we used 40  $\mu$ M

149 VER in HeLa EGFP-CHIP and MCF7 cells as this concentration was successfully  
150 applied to inhibit HSP70 activity in HeLa cells during recovery from the 3 h heat  
151 shock (Mediani et al., 2019). We observed CHIP levels gradually increasing in the  
152 nucleoli of HeLa EGFP-CHIP and MCF7 cells during heat shock, implying that its  
153 nucleolar migration was not affected by HSP70 inhibition (Fig. 2D and S1E).  
154 However, continuous VER treatment during heat shock and recovery blocked CHIP  
155 release during recovery, which resembled the effect of HSP70 depletion (Fig. 2D and  
156 S1E). These results suggest that HSP70 recruits CHIP in an activity-independent  
157 manner upon entry to the nucleolus, but its functional operability in this compartment  
158 is required for the recovery process and consequent CHIP release. When VER was  
159 provided only during the recovery stage, CHIP clearance from nucleoli was only  
160 slightly reduced (Fig. 2E), indicating that CHIP trapping in nucleoli depends primarily  
161 on the functionality of the HSP70 during heat shock.

162  
163 Therefore, we wanted to determine whether CHIP in the nucleolus acts as a  
164 functional protein or as the HSP70 substrate, misfolded upon heat shock. Based on  
165 observations that misfolded proteins acquire low mobility in the nucleolus (Azkanaz  
166 et al., 2019; Frottin et al., 2019), we analyzed CHIP nucleolar fraction mobility in  
167 untreated cells and in the presence of VER by recording fluorescence recovery after  
168 photobleaching (FRAP). Approximately 70% of EGFP-CHIP sequestered in nucleoli  
169 after heat shock was mobile, and HSP70 inhibition did not significantly reduce its  
170 dynamics (Fig. 2F). CHIP mobility was also unchanged after 1 h post-heat shock  
171 recovery in the presence of VER (Fig. 2G). This indicates that CHIP can form a  
172 functional, unaggregated protein in the nucleoli.

### 173 174 **Nucleolar CHIP colocalizes with the NPM1-containing granular component (GC)** 175 **phase**

176  
177 The organization of the nucleolus, involving all three layers, is essential for its role in  
178 ribosome biogenesis (Huang, 2002; Krüger et al., 2007; Riback et al., 2020). In turn,  
179 the GC is thought to be the main phase supporting misfolded proteins translocated  
180 there during proteotoxic stress (Azkanaz et al., 2019; Frottin et al., 2019). To study  
181 CHIP specific localization in the nucleolus, we performed colocalization analysis  
182 using confocal microscopy with the Airyscan detector, contributing to the improved  
183 image resolution (Wu and Hammer, 2021). HeLa EGFP-CHIP cells were stained for  
184 NPM1, a GC marker, and fibrillarin (FBL), a DFC marker. Under heat shock and  
185 recovery conditions, with or without VER, CHIP colocalized with NPM1 (Fig. 3A and  
186 3C) and, to a much lesser extent, with FBL (Fig. 3B and 3C), suggesting potential  
187 CHIP involvement in protein quality control processes in GC.

### 188 189 **CHIP import to nucleoli is not induced by nucleolar stress *per se***

190  
191 To investigate whether CHIP migration to the nucleolus can be triggered as a result  
192 of nucleolus impairment, we treated cells with low doses of the transcription inhibitor  
193 Actinomycin D (hereafter Act D), which alters the distribution of multiple nucleolar  
194 proteins, resulting in the formation of nucleolar caps (Reynolds et al., 1964; Shav-Tal  
195 et al., 2005). Act D altered the morphology of nucleoli, causing their circularization,  
196 reduction in size, and the formation of FBL nucleolar caps (Fig. S3A and S3B).  
197 However, it did not induce CHIP migration to nucleoli (Fig. 4A-C). These results  
198 support the concept that CHIP is involved in the nucleolar heat stress response

199 process rather than, for example, suppressing rRNA transcription defects. While  
200 treatment with Act D prior to heat shock did not affect CHIP migration to nucleoli (Fig.  
201 4B and 4C), it altered CHIP distribution, which more prominently overlapped with Act  
202 D-induced NPM1 ring formations (Fig. 4D). In addition, in cells exposed to Act D,  
203 CHIP exit from the nucleolus during the 2 h heat stress recovery was partially  
204 impaired (Fig. 4B, 4C and S3C). This observation suggests that proper nucleolar  
205 assembly may be necessary for CHIP dynamics.

206

### 207 **CHIP activity promotes its dynamics in the nucleolus**

208

209 We used a modified *in vitro* ubiquitination assay using total cell lysate as a CHIP  
210 source to verify if CHIP activity is maintained in nucleoli. This assay is based on the  
211 ability of an E3 ligase to self-ubiquitinate in the presence of the complete  
212 ubiquitination enzymatic cascade, namely E1 ubiquitin-activating enzyme, E2  
213 ubiquitin-conjugating enzyme, and E3 ligase of interest, with the addition of ubiquitin  
214 and ATP, and was repeatedly used to assess CHIP activity in other studies (Murata  
215 et al., 2001; Das et al., 2021). We found that neither heat shock nor recovery period  
216 affected CHIP ubiquitination activity (Fig. 5A). This is in line with the mobile and  
217 unaggregated nucleolar fraction of CHIP (Fig. 2F and G) and implies its capability of  
218 performing self- or substrates' ubiquitination. We also investigated whether CHIP  
219 activity is required for its translocation using the catalytically-inactive CHIP H260Q  
220 mutant (Hatakeyama et al., 2001). We found that the activity of CHIP is not  
221 indispensable for heat shock-induced migration to the nucleolus (Fig. 5B). However,  
222 FRAP analysis of the nucleolar CHIP H260Q mutant showed a decrease in its  
223 dynamics compared to CHIP WT, suggesting that its propensity to aggregate is likely  
224 mediated by the loss of ubiquitination activity (Fig. 5C and 5D).

225

226 Nucleoli are sites for immobilization of proteins under heat stress, leading to  
227 occurrence of nucleolar foci with an amyloid-like character (Wang et al., 2019). To  
228 gain better insight into the long-term impact of proteotoxic stress on CHIP association  
229 with nucleoli and the consequences of its inactivity on this process, we subjected  
230 cells to prolonged heat shock. Interestingly, sizeable intra-nucleolar CHIP droplet-like  
231 structures could be observed after overnight heat shock in cells expressing the CHIP  
232 H260Q mutant, outnumbering their WT protein counterparts (Fig. 5E-I). These  
233 differences between CHIP WT and mutant assemblies may stem from the alterations  
234 in CHIP H260Q dynamics within the nucleolus (Fig. 5C and D). However, we do not  
235 know specific biophysical state and function of these structures.

236

### 237 **CHIP overexpression affects the nucleolar luciferase recovery**

238

239 To investigate whether CHIP abundance in nucleoli can affect the fate of misfolded  
240 proteins sorted there, we employed thermolabile luciferase as a model protein since  
241 early reports showed that CHIP could control its heat shock-denatured state  
242 (Ballinger et al., 1999; Murata et al., 2001; Kampinga et al., 2003; Rosser et al.,  
243 2007). To this end, we used the HEK293T cell line permanently expressing a fusion  
244 protein of firefly luciferase and heat-stable green fluorescent protein (GFP) carrying  
245 an N-terminal nuclear localization signal (hereafter luciferase) (Frottin et al., 2019).  
246 This luciferase translocates to nucleoli after heat shock and relocates to the  
247 nucleoplasm during recovery. We verified a similar luciferase shuttle using our heat  
248 shock/recovery scheme (Fig. 1A) and noted that transiently overexpressed CHIP

249 (tagged with mCherry) colocalizes with luciferase during heat shock (Fig. 6A). To  
250 investigate the role of CHIP in nucleolar luciferase processing, we expressed its  
251 K30A and H260Q mutants, which inhibit HSP70 binding or CHIP activity,  
252 respectively, in the aforementioned HEK293T cell line. As a proxy for luciferase  
253 abundance and regeneration, we analyzed the number of its foci in nucleoli during  
254 heat shock and the 6 h recovery period (Fig. S4A). Luciferase foci number decreased  
255 progressively during the recovery, but in cells expressing specifically CHIP WT or  
256 CHIP H260Q, their regeneration was slower than in untransfected and mCherry  
257 controls (Fig. S4A). Notably, in cells expressing the CHIP H260Q mutant luciferase  
258 recovery was not completed within the experimental 6 h time frame. This could be  
259 due to the high number of cells containing heat shock-induced luciferase foci and  
260 their presence in about 20% of non-heat shocked cells, suggesting that loss of CHIP  
261 activity had a potent destabilizing impact on luciferase. Therefore, we decided to  
262 normalize our data to correct for the differences in the number of luciferase foci  
263 during heat shock and control conditions, focusing explicitly on the ability of CHIP  
264 variants to affect luciferase nucleolar regeneration. Our analysis revealed that the  
265 elevated CHIP level induced a delay in the dissolution of nucleolar luciferase foci  
266 during recovery (Fig. 6B). Overexpression of CHIP WT and CHIP H260Q had the  
267 most potent effect on reducing luciferase exit from the nucleolus, and there was no  
268 difference in the rate of luciferase recovery between the two variants. In contrast,  
269 overexpression of the CHIP K30A mutant exerted a marginal effect on this process  
270 (Fig. 6B). When we transfected cells with lower amounts of plasmids to induce milder  
271 overexpression of CHIP variants and examined the first two hours of recovery from  
272 heat shock, we still observed comparable inhibition of decline of luciferase foci during  
273 recovery by CHIP WT and the H260Q mutant and no significant effect of CHIP K30A  
274 (Fig. S4B). We assumed that this was due to the inefficient transport of CHIP K30A  
275 to nucleoli, as in HeLa Flp-In cells (Fig. 1E). Surprisingly, we found comparable  
276 redistribution of all CHIP variants to nucleoli during heat shock, suggesting an  
277 alternative pathway for CHIP recruitment to nucleoli unaccompanied by HSP70 in  
278 HEK293T cells (Fig. 6C). Hence, the above results suggest that the slowed  
279 resolution of luciferase foci in nucleoli may be related to cross-talk between CHIP  
280 and HSP70.

281  
282 We next assessed luciferase levels as the ratio of its intensity between nucleolus and  
283 nucleoplasm, as measured immediately after heat shock and during the 6 h recovery  
284 period. The distribution of luciferase in untransfected or mCherry-transfected control  
285 cells was predominant in the nucleoplasm already at the initial stage of recovery.  
286 However, in cells overexpressing CHIP WT, the nucleolar luciferase signal was still  
287 noticeable after 3 h of recovery, again indicating that the regeneration rate of  
288 luciferase was disrupted (Fig. 6D). While the CHIP K30A mutant showed the least  
289 disruption in the redistribution of luciferase, the CHIP H260Q mutant resulted in its  
290 most extended nucleolar persistence (Fig. 6D). We also observed that CHIP was  
291 leaving the nucleoli during recovery, concomitantly with nucleolar luciferase  
292 disappearance, with the slowest rate for the CHIP H260Q mutant (Fig. 6C). Thus, we  
293 assume that CHIP-dependent ubiquitination may contribute to luciferase processing  
294 in nucleoli and regeneration efficiency.

295  
296 As prolonged heat shock was shown to compromise nucleolar quality control and  
297 inhibit luciferase regeneration (Frottin et al., 2019), we set out to investigate the  
298 effects of CHIP on regeneration under these conditions. We measured luciferase

299 intensity in nuclei and nucleoli and monitored the number of luciferase foci during the  
300 6 h heat shock at 42°C. Control cells and cells expressing CHIP K30A, but not cells  
301 expressing CHIP WT and H260Q, were capable of almost complete dissolution of  
302 luciferase foci (Fig. S5A, S5B). However, we observed sustained sequestration of  
303 CHIP H260Q into nucleoli after prolonged heat stress (Fig. S5C). Thus, we  
304 concluded that CHIP repressed rather than enhanced nucleolar luciferase  
305 regeneration. Furthermore, our results on CHIP K30A suggest that the interaction of  
306 CHIP with HSP70 may play a role in modulating the nucleolus regeneration capacity  
307 and CHIP translocation to the nucleoplasm.

### 308 309 **HSP70 inhibition aggravates the negative effect of CHIP on luciferase** 310 **regeneration**

311  
312 We next examined the effect of CHIP on luciferase regeneration in the presence of  
313 VER, the HSP70 inhibitor. Cells were treated with VER only during post-heat shock  
314 recovery, and the number of nucleolar luciferase foci was measured after 1 h and 2 h  
315 of recovery. In untransfected cells, we did not record any impact of VER on luciferase  
316 regeneration. Cells overexpressing CHIP WT showed mildly impaired nucleolar  
317 luciferase regeneration in the presence of VER, which became apparent after the  
318 second hour of recovery compared to condition where it was absent (Fig. 7A).  
319 However, overexpression of the CHIP K30A in cells with added VER had a more  
320 disruptive effect relative to untreated cells (Fig. 7B). The result for the CHIP K30A  
321 mutant was unexpected as, unlike the WT protein, it should not interfere with the  
322 HSP70 function, which may suggest the emergence of additional effects associated  
323 with the chaperone inhibition. Since the negative effect on luciferase regeneration in  
324 CHIP H260Q-expressing cells was also potentially enhanced by HSP70 inhibition, we  
325 speculate that protection against protein aggregation in the nucleolus requires a  
326 balance between HSP70 and E3 CHIP activity.

### 327 328 **DISCUSSION**

329  
330 The nucleolus possesses numerous functions, including ribosome biogenesis,  
331 nuclear organization, regulation of global gene expression, and energy metabolism  
332 (Cerqueira and Lemos, 2019). It also responds to multiple stresses, such as hypoxia,  
333 pH fluctuations, redox stress, DNA damage, or proteasome inhibition, and acts as a  
334 protein quality control center that can mitigate heat shock-induced proteotoxicity  
335 (Mekhail et al., 2005; Latonen et al., 2011; Audas et al., 2012; Yang et al., 2016;  
336 Lindström et al., 2018; Alberti and Carra, 2019; Azkanaz et al., 2019; Frottin et al.,  
337 2019; Mediani et al., 2019; Szaflarski et al., 2022). In our studies, we focused on the  
338 latter function. It was previously suggested that the nucleolus creates a favorable  
339 environment for the HSP70-mediated protection and recovery of heat stress-sensitive  
340 proteins (Nollen et al., 2001; Azkanaz et al., 2019; Frottin et al., 2019; Mediani et al.,  
341 2019). These include the epigenetic modifier family of Polycomb group (PcG)  
342 proteins and the exogenous thermolabile luciferase (Azkanaz et al., 2019; Frottin et  
343 al., 2019). In addition, Frottin et al. demonstrated reversible accumulation of CDK1  
344 and BRD2 proteins in the nucleolus under heat stress, and Mediani et al. pointed to  
345 DRiPs (defective ribosomal products) accumulating in the nucleolus that undergoes  
346 reversible amyloidogenesis after heat shock or proteasome inhibition (Frottin et al.,  
347 2019; Mediani et al., 2019). To better understand the proteotoxic stress-dependent  
348 management of proteins in the nucleolus, we set out to study the protein quality

349 control ubiquitin ligase CHIP, which is well known for its role in ubiquitination of  
350 HSP70 substrates, and whose presence in the nucleolus after heat stress has been  
351 reported in recent proteomic analyses (Demand et al., 2001; Petrucelli et al., 2004;  
352 Joshi et al., 2016; Azkanaz et al., 2019; Frottin et al., 2019).

353

354 We found that CHIP translocation to the nucleolus was caused by heat stress but not  
355 by Act D, ruling out a direct CHIP response to transcriptional stress and inhibition of  
356 rRNA transcription. CHIP migration was partially dependent on HSP70; however, its  
357 chaperone activity was not required. Of note, it was previously reported that the  
358 HSP70 inhibitor, VER, does not inhibit heat shock-induced nucleolar accumulation of  
359 the HSP70 substrate, PcG protein (GFP::CBX2) (Azkanaz et al., 2019). VER  
360 competes with ATP and ADP for binding to HSP70 and reduces the rate of  
361 nucleotide association and ATP-induced substrate release (Schlecht et al., 2013), but  
362 there are no studies on the effect of this compound on HSP70-CHIP complex  
363 formation and stability. Thus, although our data show that HSP70 inhibition did not  
364 affect CHIP migration to the nucleolus, further studies are needed to elucidate this  
365 mechanism. It may be questioned whether the accumulation of CHIP in the nucleolus  
366 implies that it is the HSP70 substrate that undergoes chaperone protection and is  
367 refolded during regeneration before being released from this compartment. Our  
368 FRAP analysis showed that approximately 30% of total CHIP was immobile in the  
369 nucleolus in the HeLa EGFP-CHIP cells. Heat shock also induces a similar formation  
370 of the immobile GFP-NPM1 protein fraction, which implies altered properties of the  
371 GC due to its association with misfolded proteins that accumulate in this phase upon  
372 heat shock (Frottin et al., 2019). Thus, it is likely that CHIP embedded in GC  
373 associates with aggregated proteins, which affects its mobility.

374

375 What is the role of CHIP in the nucleolus? We hypothesized that in collaboration with  
376 HSP70, CHIP might serve as a ubiquitin ligase or co-chaperone that regulates  
377 ubiquitination or substrate reassembly to aid in the regeneration process. To revise  
378 this, we focused on recovering a specifically modified luciferase that contained a  
379 nucleus-targeting sequence to facilitate its accumulation in the nucleolus upon heat  
380 shock. The effect of CHIP on luciferase status during heat shock and recovery but  
381 not in association with the nucleolus was previously studied *in vitro* and *in cellulo*,  
382 showing ambiguous results. CHIP can maintain denatured luciferase in a state  
383 capable of folding and ubiquitinate it *in vitro* (Rosser et al., 2007). Moreover, heat  
384 shock may enhance CHIP chaperone activity and its ability to suppress luciferase  
385 aggregation *in vitro* (Rosser et al., 2007). In heat-stressed HEK293 cells, it was  
386 demonstrated that CHIP overexpression protected luciferase activity and did not  
387 cause its increased degradation. CHIP was also able to specifically interact with  
388 thermally denatured luciferase rather than with the refolded one (Rosser et al., 2007).  
389 In fibroblasts, CHIP overexpression did not affect luciferase degradation after heat  
390 shock and during recovery but increased its HSP70-dependent reassembly and  
391 protected it from heat-induced insolubility (Kampinga et al., 2003). On the other hand,  
392 there are also conflicting data indicating that CHIP overexpression can inhibit the  
393 renaturation of denatured luciferase in Cos-7 cells and reduce HSP70 or  
394 HSP70:HSP40-mediated luciferase folding *in vitro* (Ballinger et al., 1999; Marques et  
395 al., 2006). Overall, the effect of CHIP on luciferase status is indisputable but may  
396 depend on multiple factors.

397



398 Our results suggest that CHIP abundance in nucleoli slows the rate of luciferase  
399 recovery from heat shock. Knowing that there is no increased aggregation of CHIP in  
400 nucleoli, we consider it unlikely that the presence of CHIP imposes additional stress  
401 on this organelle. Furthermore, noting that the CHIP HSP70-binding deficient K30A  
402 mutant does not significantly delay luciferase refolding despite its presence in  
403 nucleoli, we propose that CHIP controls this process via interaction with HSP70.  
404 Regulation of HSP70 by CHIP in the nucleolus may involve a reduction in the affinity  
405 of this chaperone for substrates, as shown previously (Ballinger et al., 1999;  
406 Stankiewicz et al., 2010). Also, CHIP may affect the rate of ATP hydrolysis by HSP70  
407 (Stankiewicz et al., 2010), which may also shape the condensation state in the  
408 nucleolus and thus the environment for the recovery processes (Yewdall et al.,  
409 2021). Noteworthy, HSP70 may inhibit CHIP ubiquitination activity (Narayan et al.,  
410 2015; Das et al., 2021), resulting in a functional co-regulation of these proteins to  
411 select the optimal heat stress response in the nucleolus. We would also like to point  
412 out that we observed significantly higher CHIP levels in the nucleoli of heat-stressed  
413 HeLa EGFP-CHIP or MCF7 cells than in the luciferase-expressing HEK293T cells  
414 upon CHIP overexpression. We speculate that these particular cancer cells may  
415 more intensively utilize CHIP to manage proteostasis in the nucleus.

416  
417 The role of CHIP ubiquitination activity in protein recovery in the nucleolus remains  
418 elusive and thus requires further study, perhaps by using other inactive CHIP  
419 variants and investigating their effects on ubiquitination and recovery of specific  
420 endogenous proteins. However, our FRAP analysis and data obtained from  
421 prolonged heat shock revealed altered dynamics and pro-aggregation characteristics  
422 of the catalytically inactive CHIP H260Q mutant, which we hypothesize may indirectly  
423 affect nucleolar protein regeneration. It would be interesting to investigate whether  
424 other CHIP inactive variants, also pathogenic, show greater sensitivity to heat stress,  
425 affecting nucleoli regeneration.

426  
427 The mechanisms that trigger CHIP clearance from the nucleolus during regeneration  
428 are also unclear. We observed that the signals indicating the presence of luciferase  
429 and CHIP in the nucleolus decreased with similar dynamics, suggesting that some  
430 level of recovery must be achieved before CHIP is released. Recent proteomic data  
431 revealed proteins associated with NPM1 in recovering from heat shock VER-treated  
432 HEK293T cells, showing a persistent impairment of nucleolar regeneration in the  
433 presence of the inhibitor (Frottin et al., 2019). Intriguingly, CHIP was not identified in  
434 this study, although it was detected in nucleoli after heat shock when VER was not  
435 added. This may suggest that CHIP acts specifically and targets selected nucleolar  
436 proteins during the regeneration process. When we treated cells with VER  
437 throughout the heat shock and recovery, we encountered increased CHIP levels in  
438 HeLa EGFP-CHIP and MCF7 cells. This further supports our hypothesis on the  
439 functional cross-talk between CHIP and HSP70, and HSP70 inhibition-dependent  
440 CHIP response to alterations in the recovery efficiency.

441  
442 We also found that cells can clear nucleolar luciferase foci even after prolonged heat  
443 shock, and this process is also affected by CHIP overexpression. Frottin et al.  
444 showed that prolonged heat shock overloads nucleolar capacity in the same cells  
445 and may be responsible for aberrant phase behavior associated with the danger of  
446 irreversible protein aggregation (Frottin et al., 2019). The process was entirely  
447 reversible in our hands, suggesting that cells adapted to stress. It is important to note

448 that in our experimental scheme, cells were exposed to 42°C heat shock instead of  
449 43°C. Therefore, it would be interesting to test if we balanced around the “point of no  
450 return” where we came across a temperature-dependent differential cell capability to  
451 manage stress. In conclusion, we predict that the presence of CHIP in nucleoli may  
452 provide a mechanism for selective and regulated recovery of proteins, which may be  
453 relevant for cell survival during proteotoxic stress.

454

## 455 **FIGURE LEGENDS**

456

### 457 **Fig. 1 CHIP translocates to nucleoli in heat-stressed cells**

458

- 459 A) Scheme of the heat shock assay. In most experiments, cells were exposed to  
460 heat stress at 42°C for 90 min (120 min for HEK293T cells) and transferred to  
461 37°C for 2 h recovery.
- 462 B) Overexpressed EGFP-CHIP in HeLa Flp-In cells (HeLa EGFP-CHIP cells)  
463 shows nucleolar localization after heat shock (white arrowheads). Cells were  
464 imaged live before heat shock (control), immediately after heat shock (HS),  
465 and post-heat shock recovery (Rec). Scale bar represents 10  $\mu$ m.
- 466 C) Endogenous CHIP can migrate to nucleoli upon heat shock. Confocal images  
467 of HeLa Flp-In cells after immunofluorescent staining for CHIP (green) and  
468 NPM1 (red) in control, heat-stressed (HS), and recovered (Rec) cells. Scale  
469 bar represents 10  $\mu$ m.
- 470 D) Western blot after HeLa Flp-In cell fractionation to cytoplasmic (Cyt),  
471 nucleoplasmic (Nuc), and nucleolar fractions showing CHIP and HSP70  
472 accumulation in nucleoli after heat shock. Fractions purity was evaluated by  
473 detecting  $\alpha$ -tubulin (cytoplasm), lamin B1 (nucleoplasm), and fibrillarin, FBL  
474 (nucleoli).
- 475 E) Representative confocal images of HeLa Flp-In cells transiently expressing the  
476 EGFP-CHIP K30A show weaker translocation of this co-chaperone mutant to  
477 nucleoli upon heat shock (HS). Scale bar represents 10  $\mu$ m.

478

479

### 480 **Fig. 2 HSP70-dependent localization of CHIP in nucleoli**

481

- 482 A) CHIP colocalizes with HSP70 upon heat shock. Confocal images (with  
483 Airyscan) of HeLa EGFP-CHIP cells after immunostaining for HSP70 (red).  
484 Scale bar represents 5  $\mu$ m.
- 485 B) HSP70 recruits CHIP to nucleoli during heat shock. Quantification of mean  
486 CHIP intensity in nucleoli during 90 min heat shock and 2 h-recovery in HeLa  
487 EGFP-CHIP cells upon HSP70 knockdown. Data are means of three  
488 independent experiments. Error bars show SD. Statistical significance was  
489 determined using a two-way ANOVA followed by Tukey’s multiple comparison  
490 test ( $***P < 0.001$ ,  $**P < 0.01$ ,  $*P < 0.05$ ).
- 491 C) Quantification of the percentage of cells with CHIP present in nucleoli during  
492 heat shock and 2 h-recovery in HeLa EGFP-CHIP cells upon HSP70  
493 knockdown. Data are means of three independent experiments. Error bars  
494 show SD. Statistical significance was determined using a two-way ANOVA  
495 followed by Tukey’s multiple comparison test ( $****P < 0.0001$ ).
- 496 D) HSP70 inhibition by VER does not affect CHIP migration to nucleoli during  
497 heat shock but blocks its release during recovery. HeLa EGFP-CHIP cells

498 were treated with 40  $\mu$ M VER before heat shock, and CHIP intensity was  
499 measured in nucleoli in control cells during heat shock and 2 h-recovery. Data  
500 are means of three independent experiments. Error bars show SD. Statistical  
501 significance was determined using a two-way ANOVA followed by Tukey's  
502 multiple comparison test ( $****P < 0.0001$ ,  $***P < 0.001$ ,  $**P < 0.01$ ,  $ns P >$   
503  $0.05$ ).

504 E) HSP70 inhibition by VER during post-heat shock recovery only slightly affects  
505 CHIP clearance from nucleoli. HeLa EGFP-CHIP cells were exposed to 90  
506 min heat shock and treated with 40  $\mu$ M VER before transferring them for the 2  
507 h-recovery. CHIP intensity was measured in nucleoli in control cells during  
508 heat shock and recovery. Data are means of four independent experiments.  
509 Error bars show SD. Statistical significance was determined using two-tailed  
510 unpaired t-tests for pairwise comparisons ( $****P < 0.0001$ ,  $***P < 0.001$ ,  $*P <$   
511  $0.05$ ).

512 F) CHIP maintains high mobility in the nucleolus upon heat shock. Analysis of  
513 FRAP kinetics of EGFP-CHIP in the nucleolus of untreated (green) or treated  
514 with 40  $\mu$ M VER (red) HeLa EGFP-CHIP cells during heat shock. Points show  
515 mean values from 9 or 19 nucleoli analysis from untreated or VER-treated  
516 cells, respectively. Error bars show SD (grey for untreated cells, pink for VER-  
517 treated cells). Fitting curves are shown in black.

518 G) CHIP dynamics quantification in HeLa EGFP-CHIP cells during post-heat  
519 shock recovery in the presence of 40  $\mu$ M VER. FRAP kinetics were measured  
520 in 15 nucleoli after 1 h-recovery. Error bars show SD. A fitting curve is shown  
521 in black.

522  
523 **Fig. 3 Nucleolar CHIP colocalizes with the NPM1-containing granular**  
524 **component (GC) phase**  
525

526 A) Confocal images (with Airyscan) of HeLa EGFP-CHIP cells immunostained for  
527 NPM1. Cells were exposed to the following conditions: heat shock, heat shock  
528 in the presence of 40  $\mu$ M VER, or treated with VER throughout heat shock and  
529 recovery (HS + Rec + VER), followed by immunostaining. Scale bar  
530 represents 5  $\mu$ m.

531 B) Confocal images (with Airyscan) of HeLa EGFP-CHIP cells immunostained for  
532 FBL. Cells were exposed to the following conditions: heat shock, heat shock in  
533 the presence of 40  $\mu$ M VER, or treated with VER throughout heat shock and  
534 recovery (HS + Rec+ VER), followed by immunostaining. Scale bar represents  
535 5  $\mu$ m.

536 C) Quantification of the degree of colocalization of EGFP-CHIP and NPM1 and  
537 EGFP-CHIP and FBL using Pearson's correlation coefficient. Violin plots show  
538 the data from 31 to 70 nucleoli analyzed per condition. Two-tailed unpaired t-  
539 tests were used for comparisons. Statistical significance level  $****P < 0.0001$ .

540  
541 **Fig. 4 CHIP import to nucleoli is not induced by nucleolar stress *per se***  
542

543 A) Actinomycin D (Act D) does not induce CHIP migration to nucleoli in HeLa  
544 EGFP-CHIP cells. Cells were treated with 0.05  $\mu$ g/ml Act D for 30 min or 2 h  
545 and imaged live. Representative confocal images of cells after 2 h Act D  
546 treatment. Scale bar represents 10  $\mu$ m.

- 547 B) Pretreatment with 0.05  $\mu\text{g/ml}$  Act D before heat shock does not affect CHIP  
548 migration to nucleoli during heat shock but impairs its exit. Quantification of  
549 mean CHIP intensity in nucleoli after 90 min heat shock and 2 h-recovery in  
550 HeLa EGFP-CHIP cells pretreated with Act D for 30 min or 2 h. Data are  
551 means of three independent experiments. Error bars show SD. Statistical  
552 significance was determined using a one-way ANOVA followed by Dunnett's  
553 multiple comparison tests ( $****P < 0.0001$ ,  $*P < 0.05$ ).
- 554 C) Pretreatment with 0.05  $\mu\text{g/ml}$  Act D before heat shock does not affect CHIP  
555 migration to nucleoli during heat shock but impairs its exit. Quantification of  
556 the percentage of cells with CHIP present in nucleoli after 90 min heat shock  
557 and 2 h-recovery in HeLa EGFP-CHIP cells pretreated with Act D for 30 min  
558 or 2 h. Data are means of three independent experiments. Error bars show  
559 SD. Statistical significance was determined using a one-way ANOVA followed  
560 by Dunnett's multiple comparison tests ( $**P < 0.01$ ).
- 561 D) Treatment with Act D prior to heat shock alters CHIP distribution in nucleoli.  
562 HeLa EGFP-CHIP cells were pretreated with 0.05  $\mu\text{g/ml}$  Act D for 2 h before  
563 heat shock, followed by immunostaining for NPM1 and confocal imaging.  
564 Representative images and their magnified views of cells after heat shock  
565 (HS) vs. cells treated with Act D before heat shock (Act D + HS) are shown.  
566 Scale bars represent 10  $\mu\text{m}$  or 5  $\mu\text{m}$  (magnified views).  
567

568 **Fig. 5 CHIP activity promotes its dynamics in the nucleolus**  
569

- 570 A) Heat shock and post-heat shock recovery do not affect CHIP ubiquitination  
571 activity. Western blot depicting CHIP auto-ubiquitination following *in vitro*  
572 ubiquitination assay. HEK EGFP-CHIP cells were exposed to 90 min heat  
573 shock and 1 h-recovery. After treatment, cell lysates were used for *in vitro*  
574 ubiquitination assay. The assays performed in the presence of the lysate  
575 without other components in the reaction mixture (lysate) or without the  
576 addition of ubiquitin (- Ub) were served as negative controls. Protein samples  
577 were resolved via SDS-PAGE and immunoblotted with anti-GFP and GAPDH  
578 (loading control) antibodies.
- 579 B) Inactive CHIP H260Q mutant can migrate to nucleoli during heat shock.  
580 Representative confocal images of HeLa Flp-In cells transiently expressing the  
581 EGFP-CHIP H260Q mutant in control conditions and after heat shock (HS).  
582 The arrowhead points at the nucleolus containing mutant CHIP. Scale bar  
583 represents 10  $\mu\text{m}$ .
- 584 C) The CHIP H260Q mutant shows reduced mobility in nucleoli. FRAP kinetics of  
585 CHIP H260Q compared to CHIP WT in nucleoli of heat-shocked cells. The  
586 mutant CHIP mobility was measured in HeLa Flp-In cells after transient  
587 expression of EGFP-CHIP H260Q. FRAP analysis of EGFP-CHIP WT was  
588 originally shown in Fig. 2F and is displayed here again for comparison with  
589 CHIP H260Q recovery curves. CHIP H260Q FRAP kinetics were measured in  
590 12 nucleoli. Error bars show SD. Fitting curves are shown in black.
- 591 D) Confocal images of nucleolar EGFP-CHIP WT (upper panel) and EGFP-CHIP  
592 H260Q mutant (bottom panel), showing movie frames before bleaching and 0,  
593 10, 30, and 50 s after bleaching in the FRAP assays. The bleached region of  
594 interest is marked with circles. Differences in CHIP intensities are displayed  
595 in pseudo-colored images using Green Fire Blue LUT (look-up table) in ImageJ  
596 software. Scale bars represent 2  $\mu\text{m}$ .

- 597 E) Large droplet-like structures are preferentially formed by the CHIP H260Q  
598 mutant in nucleoli of cells exposed to prolonged heat shock. Representative  
599 confocal images of HeLa Flp-In cells transiently expressing mCherry,  
600 mCherry-CHIP WT, and mCherry-CHIP H260Q mutant and treated with  
601 overnight heat shock. Arrowheads point at CHIP intra-nucleolar assemblies.  
602 Scale bar represents 5  $\mu$ m.
- 603 F) Quantification of the percentage of nucleoli with CHIP droplet-like structures  
604 after overnight heat shock in cells transiently expressing CHIP WT or the  
605 CHIP H260Q mutant. Data were collected from two independent experiments:  
606 38 and 43 nucleoli with CHIP WT and H260Q mutant, respectively.
- 607 G) Boxplot of the mean intensities of CHIP droplet-like structures inside nucleoli  
608 of cells transiently expressing CHIP WT or the CHIP H260Q mutant after  
609 overnight heat shock. Note that if there were several droplets inside nucleoli,  
610 the intensity was measured for the brightest one. 17 CHIP WT and 38 CHIP  
611 H260Q droplets across two biological repeats were analyzed. The line in the  
612 middle of the box is plotted at the median. Whiskers extend from the 5<sup>th</sup> to 95<sup>th</sup>  
613 percentiles. Two-tailed Welch's t-test was used for comparison,  $**P < 0.01$ .
- 614 H) Quantification of the diameters of CHIP droplet-like structures inside nucleoli  
615 of cells transiently expressing CHIP WT or the CHIP H260Q mutant after  
616 overnight heat shock. Note that if there were several droplets inside nucleoli,  
617 the measurement was performed for the biggest one. 17 CHIP WT and 38  
618 CHIP H260Q droplets across two biological repeats were analyzed. The line in  
619 the middle of the box is plotted at the median. Whiskers extend from the 5<sup>th</sup> to  
620 95<sup>th</sup> percentiles. For comparison two-tailed Mann-Whitney test was used,  $*P <$   
621 0.05.
- 622 I) Boxplot of the areas of CHIP droplet-like structures inside nucleoli of cells  
623 transiently expressing CHIP WT or the CHIP H260Q mutant after overnight  
624 heat shock. Note that if there were several droplets inside nucleoli, the  
625 measurement was performed for the biggest one. 17 CHIP WT and 38 CHIP  
626 H260Q droplets across two biological repeats were analyzed. The line in the  
627 middle of the box is plotted at the median. Whiskers extend from the 5<sup>th</sup> to 95<sup>th</sup>  
628 percentiles. For comparison two-tailed Mann-Whitney test was used,  $*P <$   
629 0.05.

630  
631 **Fig. 6 CHIP overexpression affects the nucleolar luciferase recovery**

- 632  
633 A) Nucleolar CHIP colocalizes with luciferase after heat shock. HEK293T cells  
634 stably expressing luciferase were transfected with mCherry-CHIP and subject  
635 to heat shock for 2 h. After treatment cells were immunostained for NPM1 and  
636 imaged using the Airyscanning technique. Arrowheads show overlapped  
637 signals of luciferase (green), mCherry-CHIP (red) and NPM1 (purple). Scale  
638 bars represent 5  $\mu$ m.
- 639 B) Luciferase foci dissolution during post-heat shock recovery is slower in cells  
640 expressing CHIP WT or CHIP H260Q but not in cells expressing CHIP K30A.  
641 HEK293T cells permanently expressing luciferase were transfected with  
642 vectors encoding for mCherry, mCherry-CHIP WT, mCherry-CHIP H260Q and  
643 mCherry-CHIP K30A. 24 h after transfection cells were subject to 2 h heat  
644 shock and the recovery was monitored for 6 h afterward. Cells were imaged  
645 live using confocal microscopy. Luciferase foci were counted in untransfected  
646 and mCherry-expressing cells (control groups) and cells expressing the

647 appropriate CHIP variant. The percentage of cells with nucleolar luciferase foci  
648 was determined for each condition. Data were normalized to correct for cell  
649 percentage differences after heat shock and in control conditions between  
650 experimental groups and are expressed as the ratio of % cells with luciferase  
651 foci at the specific time point to % cells with luciferase foci upon heat shock  
652 calculated for a given group. Data are means of three independent  
653 experiments. Error bars represent SD. For statistical comparison a two-way  
654 ANOVA with post hoc Tukey's test was used ( $***P < 0.001$ ,  $**P < 0.01$ ,  $*P <$   
655  $0.05$ ).

656 C) CHIP is redistributed to nucleoli during heat shock and leaves this  
657 compartment during recovery. During recovery, the CHIP H260Q mutant's exit  
658 from nucleoli is the slowest compared to CHIP WT and CHIP K30A. HEK293T  
659 cells permanently expressing luciferase were transfected with vectors  
660 encoding for mCherry-CHIP WT, mCherry-CHIP H260Q and mCherry-CHIP  
661 K30A and treated with 2 h heat shock followed by 6 h recovery. Cells during  
662 treatments were imaged live using confocal microscopy. Images were  
663 analyzed for the mean mCherry intensities as a proxy for CHIP concentrations  
664 in the nucleoli and nuclei, and the relative intensities were quantified. Data are  
665 means of three independent experiments. Error bars represent SD. For  
666 statistical comparison a two-way ANOVA with post hoc Tukey's test was used  
667 ( $**P < 0.01$ ,  $ns P > 0.05$ ).

668 D) CHIP WT and CHIP H260Q overexpression disrupt the regeneration rate of  
669 luciferase in nucleoli. HEK293T cells permanently expressing luciferase were  
670 transfected with vectors encoding for mCherry, mCherry-CHIP WT, mCherry-  
671 CHIP H260Q, and mCherry-CHIP K30A and treated with 2 h heat shock  
672 followed by 6 h recovery. Confocal images of live cells were taken after  
673 indicated time points and images were analyzed for mean intensities of GFP-  
674 tagged luciferase in whole nucleoli relative to nuclei. Data are means of three  
675 independent experiments. Error bars represent SD. For statistical comparison  
676 a two-way ANOVA with post hoc Tukey's test was used ( $****P < 0.0001$ ,  $***P$   
677  $< 0.001$ ,  $ns P > 0.05$ ).

679 **Fig. 7 HSP70 inhibition aggravates the negative effect of CHIP on luciferase**  
680 **regeneration**

681  
682 A) Cells overexpressing CHIP WT show mildly impaired nucleolar luciferase  
683 regeneration in the presence of VER. HEK293T cells stably expressing  
684 luciferase were transfected with the vectors encoding for mCherry-CHIP  
685 variants. 24 h after transfection cells were subject to 2 h heat shock and  
686 recovery. Prior to the recovery period cells were treated with 40  $\mu$ M VER or  
687 recovery was initiated without the compound treatment. The plot shows the  
688 quantification of nucleolar luciferase foci in untransfected cells and cells  
689 expressing CHIP WT imaged by confocal microscopy. Data are means of  
690 three independent experiments and are expressed as a % of total cell counts.  
691 Error bars represent SD. For statistical comparison, a two-way ANOVA with  
692 post hoc Tukey's test was used ( $**P < 0.01$ ,  $*P < 0.05$ ).

693 B) Overexpression of the CHIP K30A or CHIP H260Q mutants cause more  
694 disruptive effects on luciferase regeneration in the presence of VER.  
695 HEK293T cells stably expressing luciferase were transfected with the vectors  
696 encoding for mCherry-CHIP variants. Prior to the recovery period, cells were

697 treated with 40  $\mu$ M VER or recovery was initiated without the compound  
698 treatment. The plot shows the quantification of nucleolar luciferase foci in cells  
699 expressing CHIP K30A and CHIP H260Q imaged by confocal microscopy.  
700 Data are means of three independent experiments and are expressed as a %  
701 of total cell counts. Error bars represent SD. For statistical comparison a two-  
702 way ANOVA followed by Tukey's multiple comparison test was used ( $***P <$   
703  $0.001$ ,  $**P < 0.01$ ,  $*P < 0.05$ ).

704

## 705 SUPPLEMENTARY FIGURE LEGENDS

706

### 707 Figure S1. CHIP localizes to nucleoli specifically during heat shock

708

709 A) A simplified scheme of genomic elements after targeted integration of the  
710 EGFP-CHIP transgene into HeLa Flp-In T-REx and 293 Flp-In T-REx cell lines  
711 (modified from (Szczyzny et al., 2018)). Generated cells are resistant to  
712 hygromycin B but sensitive to zeocin selection antibiotic. The EGFP-CHIP  
713 expression is repressed by the activity of the repressor protein TetR and  
714 induced by the addition of tetracycline to the culture medium.

715 B) Other tested stressors do not induce CHIP migration to nucleoli. HEK EGFP-  
716 CHIP cells were exposed to various stressors: 90 min heat shock at 42°C,  
717 50  $\mu$ M sodium arsenite, 100 nM thapsigargin, 0.6 M sorbitol and 2 mg/ml  
718 puromycin for 2 h. Confocal images and their magnified views of cells after  
719 each stress are shown. The arrowhead shows CHIP in the nucleolus of the  
720 heat-stressed cell. Scale bars represent 10  $\mu$ m or 5  $\mu$ m (magnified views).

721 C) Confocal images of MCF7 cells transiently expressing EGFP-CHIP. Cells  
722 treated with heat shock show CHIP nucleolar accumulation. The lack of  
723 Hoechst 333412 staining recognizes nucleoli. A scale bar represents 5  $\mu$ m.

724 D) Confocal images of MCF7 cells after immunostaining for CHIP (green) and  
725 NPM1 (red). Nuclei (blue) are labelled with DAPI. Images show representative  
726 cells during control conditions, after 90 min heat shock and after heat shock  
727 and recovery in the presence of the 40  $\mu$ M VER inhibitor (HS + Rec + VER).  
728 Nucleoli are indicated by arrowheads and are also marked with dashed  
729 circles. A scale bar represents 5  $\mu$ m.

730 E) Quantification of relative mean CHIP intensities: from nucleoli vs. nuclei in  
731 MCF7 cells from confocal images. Selected images are shown in Figure S1D.  
732 Cells were treated with heat shock and 2 h recovery without or with VER,  
733 which was applied either for complete treatment (HS + Rec + VER) or only  
734 during recovery (Rec + VER). Control cells also received 40  $\mu$ M VER for 2 h.  
735 Plotted data show individual experiments. For statistical comparison a one-  
736 way ANOVA followed by Tukey's multiple comparison test was used ( $**P <$   
737  $0.01$ ,  $*P < 0.05$ ).

738

### 739 Figure S2. Validation of HSP70 knockdown efficiency in HeLa EGFP-CHIP cells

740

741 A) Confocal images of HeLa EGFP-CHIP cells after HSP70 knockdown *via*  
742 siRNA. To control for the effects of siRNA delivery, nontargeting siRNA was  
743 used (sineg). 72 h after siRNA transfection, control and heat-shocked cells  
744 were immunostained for HSP70 (red) and the nuclei were stained with DAPI.  
745 Scale bars represent 10  $\mu$ m.

746

747 **Figure S3. Actinomycin D (Act D) alters nucleolar morphology resulting in**  
748 **prolonged sequestration of CHIP in nucleoli during recovery from heat shock**

749

750 A) Confocal images of HeLa EGFP-CHIP cells after immunostaining for NPM1  
751 (left panel) and FBL (right panel). Indicated cells were pretreated with 0.05  
752  $\mu\text{g/ml}$  Act D for 2 h followed by immunostaining and confocal imaging.  
753 Arrowheads point at FBL nucleolar caps formed in the presence of Act D.  
754 Scale bars represent 10  $\mu\text{m}$ .

755 B) Analysis of changes in nucleolar morphology upon Act D treatment. HeLa  
756 EGFP-CHIP cells were treated with 0.05  $\mu\text{g/ml}$  Act D for 30 min and 2 h alone  
757 or followed by 90 min heat shock. Next, cells were fixed and immunostained  
758 for NPM1 and FBL nucleolar proteins. The mean nucleolar area, circularity  
759 (based on NPM1 signal) and percentage of nuclei with nucleolar caps (based  
760 on FBL signal) were quantified. Data are means of two (area, circularity) and  
761 three (nucleolar caps) independent experiments. Error bars represent SD. For  
762 statistical comparison a one-way ANOVA followed by Dunnett's multiple  
763 comparisons test was used ( $***P < 0.001$ ,  $**P < 0.01$ ).

764 C) Confocal images of HeLa EGFP-CHIP cells after the 2 h-recovery from heat  
765 shock (Recovery) or pretreated with 0.05  $\mu\text{g/ml}$  Act D for 2 h before the heat  
766 shock and recovery periods (Act D + Recovery). After treatment, cells were  
767 imaged live. Arrowheads indicate nucleolar CHIP in Act D- treated cells. Scale  
768 bar represents 10  $\mu\text{m}$ .

769

770 **Figure S4. CHIP overexpression affects the nucleolar luciferase recovery**

771

772 A) HEK293T cells permanently expressing luciferase were transfected with  
773 vectors encoding for mCherry, mCherry-CHIP WT, mCherry-CHIP H260Q and  
774 mCherry-CHIP K30A. 24 h after transfection cells were subject to 2 h heat  
775 shock and the recovery was monitored for 6 h afterward. Cells were imaged  
776 live using confocal microscopy. Luciferase foci were counted in untransfected  
777 and mCherry-expressing cells (control groups) and cells expressing the  
778 appropriate CHIP variant. The percentage of cells with nucleolar luciferase foci  
779 was determined for each condition. Data are means of three independent  
780 experiments. Error bars represent SD. For statistical comparison a two-way  
781 ANOVA with post hoc Tukey's test was used ( $****P < 0.0001$ ,  $***P < 0.001$ ,  
782  $**P < 0.01$ ,  $*P < 0.05$ ).

783 B) HEK293T cells permanently expressing luciferase were transfected with  
784 vectors encoding for mCherry, mCherry-CHIP WT, mCherry-CHIP H260Q,  
785 and mCherry-CHIP K30A. Transfection was performed with 0.2  $\mu\text{g}$  plasmids  
786 per well of the 8-well chamber. 24 h after transfection cells were subject to 2  
787 h-heat shock followed by 2 h-recovery. Images of live cells at the indicated  
788 time were taken using confocal microscopy. Luciferase foci were counted in  
789 untransfected and mCherry-expressing cells (control groups) and cells  
790 expressing the appropriate CHIP variant. The percentage of cells with  
791 nucleolar luciferase foci was determined for each condition. Data  
792 normalization was performed as described in Fig. 6B. Data are means of three  
793 independent experiments. Error bars represent SD. For statistical comparison,  
794 a two-way ANOVA with post hoc Tukey's test was used ( $***P < 0.001$ ,  $**P <$   
795  $0.01$ ,  $*P < 0.05$ ).

796



797 **Figure S5. During prolonged heat shock, luciferase recovery in nucleoli is**  
798 **affected by CHIP WT and CHIP H260Q overexpression**  
799

800 A) HEK293T cells permanently expressing luciferase were transfected with  
801 vectors encoding for mCherry, mCherry-CHIP WT, mCherry-CHIP H260Q and  
802 mCherry-CHIP K30A and treated with 6 h heat shock. Every 2 h cells were  
803 imaged live using confocal microscopy. Images were analyzed for mean  
804 intensities of GFP-tagged luciferase in whole nucleoli relative to nuclei. Data  
805 are means of three independent experiments. Error bars represent SD. For  
806 statistical comparison a two-way ANOVA with post hoc Tukey's test was used  
807 (\*\*\*\* $P < 0.0001$ , \*\*\* $P < 0.001$ , *ns*  $P > 0.05$ ).

808 B) HEK293T cells permanently expressing luciferase were transfected with  
809 vectors encoding for mCherry, mCherry-CHIP WT, mCherry-CHIP H260Q and  
810 mCherry-CHIP K30A and treated with 6 h heat shock. During treatments cells  
811 were imaged by confocal microscopy. Luciferase foci were counted in  
812 untransfected and mCherry-expressing cells (control groups) and cells  
813 expressing the appropriate CHIP variant. The percentages of total cell counts  
814 were quantified for each condition. Data normalization was performed as  
815 described in Fig. 6B. Data are means of three independent experiments. Error  
816 bars represent SD. For statistical comparison, a two-way ANOVA with post  
817 hoc Tukey's test was used (\*\*\* $P < 0.001$ , *ns*  $P > 0.05$ ).

818 C) CHIP WT and H260Q show sustained sequestration into nucleoli during  
819 prolonged heat stress. HEK293T cells permanently expressing luciferase were  
820 transfected with vectors encoding for mCherry-CHIP WT, mCherry-CHIP  
821 H260Q and mCherry-CHIP K30A and treated with 6 h heat shock. Every 2 h  
822 intervals, confocal images of live cells were taken to measure CHIP intensities  
823 in nucleoli and nuclei, and the relative intensities were quantified. Data are  
824 means of three independent experiments. Error bars represent SD. For  
825 statistical comparison a two-way ANOVA with post hoc Tukey's test was used  
826 (\*\*\*\* $P < 0.0001$ , \*\*\* $P < 0.001$ , \*\* $P < 0.01$ , \* $P < 0.05$ , *ns*  $P > 0.05$ ).

827  
828

## 829 **MATERIALS AND METHODS**

830

### 831 **METHODS**

832

#### 833 Cell culture

834

835 HeLa Flp-In T-REx, HEK293 Flp-In T-REx (a kind gift from Dr. R. Szczeny), MCF7  
836 (a kind gift from Prof. A. Zyllich), HeLa EGFP-CHIP, HEK EGFP-CHIP, and HEK293T  
837 NLS LG cells (stably expressing luciferase; a kind gift from Dr. M.S. Hipp) were  
838 cultured in Dulbecco's Modified Eagle's Medium (D6429, Sigma) supplemented with  
839 10% heat-inactivated fetal bovine serum (Sigma) and 1% antibiotic - antimycotic  
840 (Gibco) at 37°C with 5% CO<sub>2</sub> in a humidified incubator. To maintain stable cell lines,  
841 HeLa EGFP-CHIP and HEK EGFP-CHIP cells were supplemented with blasticidin  
842 (10 µg/ml) (ant-bl-1, Invivogen) and hygromycin B (50 µg/ml) (10687010, Thermo  
843 Fisher Scientific), while 293T NLS LG cells were supplemented with G418 (100  
844 µg/ml) (10131035, Gibco). For the experiment, the EGFP-CHIP expression in HeLa  
845 EGFP-CHIP and HEK EGFP-CHIP cells was induced by adding tetracycline to the  
846 medium (25 ng/ml) upon plating. Where indicated, to induce heat shock, cells were

847 transferred to another humidified incubator set at 42°C. For the recovery, cells were  
848 transferred back to 37°C. For passaging and experiments, cells were dissociated  
849 from the plate with trypsin (Trypsin-EDTA 0.25%, Sigma). Cells were tested for  
850 mycoplasma using a PCR-based assay.

851

#### 852 Poly-L-lysine coating

853

854 HEK293T cells were grown on cover glasses or 8 well-chambered slides (Ibidi)  
855 coated with Poly-L-lysine solution (P4707, Sigma). The coating was performed for 1  
856 h at 37°C, followed by two washes in sterile PBS and drying under a laminar flow  
857 hood.

858

859

#### 860 Tetracycline preparation

861

862 Tetracycline was prepared according to an established protocol (Szczeny et al.,  
863 2018). Briefly, tetracycline was added to 96% ethanol at the 5 mg/ml concentration.  
864 The solution was rotated for 30 min at room temperature and incubated overnight at  
865 -20°C. The next day the rotation was repeated for 30 min. Afterward, it was filtered  
866 through the 0.22 µm syringe filter and diluted with ethanol to the final concentration of  
867 100 µg/ml. The solution was stored at -20°C.

868

#### 869 Plasmid construction

870

871 Vectors: pKK-EGFP-TEV and pKK-mCherry-TEV were a kind gift from Dr. R.  
872 Szczeny.

873 The sequence and ligation independent cloning (SLIC) method was used to construct  
874 mCherry-CHIP, mCherry-CHIP H260Q, mCherry-CHIP K30A, EGFP-CHIP, EGFP-  
875 CHIP H260Q plasmids. The parental vectors (pKK-EGFP-TEV and pKK-mCherry-  
876 TEV) were linearized with BshTI i NheI enzymes. For SLIC cloning, linearized vectors  
877 were mixed with PCR-amplified human CHIP sequence and treated with T4 DNA  
878 polymerase, followed by bacterial transformation. The following primers were used  
879 for CHIP sequence amplification:

880

#### 881 **hCHIP forward:**

882 GGATCCgaaaacctgtacttccaaggaACCGGTATGAAGGGCAAGGAGGAGAAG

#### 883 **hCHIP reverse:**

884 GATATCaccctgaaaatacaaatctcGCTAGCTCAGTAGTCCTCCACCCAGC

885

886 To insert H260Q mutation into the CHIP sequence, two PCR reactions were carried  
887 out using the following primers:

888

889 The 1<sup>st</sup> amplicon:

890

#### 891 **hCHIP forward:**

892 GGATCCgaaaacctgtacttccaaggaACCGGTATGAAGGGCAAGGAGGAGAAG

893 **r1:** CACGCTGCAGcTGCTCCTCGATGTCC

894

895 The 2<sup>nd</sup> amplicon:

896

897 **f1:** GGACATCGAGGAGCAgCTGCAGCGTG  
898 **hCHIP reverse:**  
899 GATATCaccctgaaaatacaaatctcGCTAGCTCAGTAGTCCTCCACCCAGC  
900

901 Afterward, splice-PCR was used to assemble both fragments.

902  
903 Sequence validation was performed using restriction enzymes (BamHI and EcoRV)  
904 and sequencing with the following primers:

905  
906 **FRTTO\_For** tgacctccatagaagacacc  
907 **FRTTO\_Rev** aactagaaggcacagtcgag  
908 **EGFP\_F** catggtcctgctggagttcg  
909 **CHIP\_For** atgaagggcaaggaggagaag

910 To generate EGFP-CHIP K30A plasmid, Q5 Site-Directed Mutagenesis Kit  
911 (E0554S, New England Biolabs) was used with the following primers:

912  
913 **F-hCHIP K30A:** GCAGGAGCTCgcGGAGCAGGGCAATC  
914 **R-hCHIP K30A:** GCGCTCGGGCTCTTCTCG

#### 915 916 Stable cell line generation

917  
918 HeLa Flp-In T-REx and HEK293 Flp-In T-REx cells were grown on 6-well plates. For  
919 stable cell line generation, the cells were co-transfected with 1 µg pOG44 (a kind gift  
920 from Dr. R. Szczeny) and 0.8 µg EGFP-CHIP plasmid using Mirus reagents: 2 ul  
921 TransIT-293 (MIR 2700, Mirus) for transfection of HEK293 Flp-In T-REx cells and 2 ul  
922 Trans-IT-HeLa and 1.3 ul Monster (MIR 2900, Mirus) for HeLa Flp-In T-REx cells.  
923 The day following transfection cells were treated with selection antibiotics: 10 µg/ml  
924 blasticidin (Invivogen) and 50 µg/ml hygromycin B (Thermo Fisher Scientific). The  
925 treatment continued for a month.

#### 926 927 Cell transfection

928  
929 Transient transfections were performed using Lipofectamine 2000 (Invitrogen)  
930 according to the manufacturer's guidelines. Cells seeded on 8 well-chambered slides  
931 (Ibidi) were transfected with 0.5 µg plasmid per well. Cells seeded for VER-155008  
932 treatment were transfected with 0.2 µg plasmid. Transfections were carried out a day  
933 before imaging.

#### 934 935 HSP70 knockdown

936  
937 HeLa EGFP-CHIP cells were seeded on 35 mm imaging dishes (Ibidi). The following  
938 day cells were co-transfected with 75 pmols HSP70 siRNAs (IDs 145248 and 6965,  
939 Thermo Fisher Scientific) using 9 µl Lipofectamine RNAiMAX reagent (Invitrogen) in  
940 Opti-MEM Reduced Serum Medium. The medium was exchanged after 48 h post-  
941 transfection. Silencing lasted 72 h.

#### 942 943 Actinomycin D and VER-155008 treatments

944

945 Cells were treated with 0.05 µg/ml Actinomycin D (Act D) (1229, Tocris) dissolved in  
946 DMSO in a complete medium for 0.5 or 2 h at 37°C. Then the cells were exposed to  
947 90 min heat shock at 42°C and 120 min of recovery at 37°C. The cells were fixed for  
948 immunofluorescence, or live cells were imaged using confocal microscopy.

949

950 VER-155008 (SML0271, Sigma) dissolved in DMSO was added to the complete  
951 medium at the final concentration of 40 µM. HEK293T and MCF7 cells were treated  
952 with VER-155008 before the heat shock, while HeLa EGFP-CHIP cells were  
953 pretreated with VER-155008 for 2 h before the heat shock. All cell lines were treated  
954 with VER-155008 immediately after the heat shock for recovery. Cells were fixed for  
955 immunofluorescence, or live cells were imaged using confocal microscopy.

956

957

### 958 Immunofluorescence

959

960 Cells were fixed with 4% (para)formaldehyde (28906, Pierce) in PBS for 10 min at  
961 room temperature before washing 3 times with PBS for 5 min. The cells were  
962 permeabilized for 10 min with Triton X-100 0.1% (v/v) in PBS at room temperature.  
963 Samples were incubated in a blocking buffer (either 2% bovine serum albumin BSA,  
964 1.5% goat serum, 0.1% Triton X-100 in PBS, or 1% BSA in PBS) for 10 min at room  
965 temperature. Primary antibodies were applied in a blocking buffer and incubated  
966 overnight at 4°C. Appropriate fluorescent secondary antibodies at a dilution of 1:500  
967 were applied after PBS washes for 60 min at room temperature in PBS. Samples  
968 were mounted using the Vectashield antifade mounting medium with DAPI (Vector  
969 Laboratories).

970

971 Primary antibodies:

972

- 973 ■ CHIP (1:250) rabbit [EPR4447] (ab134064) Abcam
- 974 ■ NPM1 (1:250) mouse (32-5200) Invitrogen
- 975 ■ FBL (1:400) rabbit (2639S) Cell Signaling Technology
- 976 ■ HSP70 (1:250) mouse (SMC-100) StressMarq Biosciences

977

978 Secondary antibodies:

979

980 Goat Alexa 647 anti-mouse (A21235, Invitrogen), goat Alexa 568 anti-mouse  
(A11031, Invitrogen), goat Alexa 647 anti-rabbit (A21245, Invitrogen).

981

### 982 Image acquisition

983

984 Confocal microscopy was performed on the ZEISS LSM800 confocal laser scanning  
985 microscope (Carl Zeiss Microscopy) using 63x/1.4 NA or 40x/1.3 NA oil immersion  
986 objectives. Images show single optical sections. Within each experiment, images  
987 were acquired using identical acquisition settings. For colocalization studies, imaging  
988 was carried out with Airyscan.

989

### 990 Image analysis

991

992 ImageJ software (<https://imagej.nih.gov/ij/index.html>) (Schneider et al., 2012) was  
993 used for image analysis in most experiments except for MCF7 immunostaining. In  
994 HeLa EGFP-CHIP cells, nucleoli were manually selected, and the CHIP (EGFP)  
intensity (mean gray value) was calculated. For colocalization studies, the JaCoP

995 plugin was used (Bolte and Cordelières, 2006). The image background was  
996 corrected using the rolling ball algorithm (rolling ball=150). Thresholds of the green  
997 and red channels were selected manually and maintained in every image.

998

#### 999 Analysis of the fluorescence intensity ratio - nucleolus: nucleus in HEK293T cells

1000

1001 Nucleoli were manually located using the Hoechst 33342 channel. Relative luciferase  
1002 or CHIP concentrations in nucleoli/nuclei were calculated based on GFP or mCherry  
1003 intensities, respectively, in each compartment in 50 cells per condition across three  
1004 biological repeats.

1005

1006

1007

1008

#### 1009 Quantification of nucleolar luciferase foci in HEK293T cells

1010

1011 Luciferase foci were counted in 47-142 cells (66-301 cells for the experiments with  
1012 VER-155008) per time point and condition across 3 biological repeats.

1013

#### 1014 Analysis of CHIP ratio in MCF7 cells

1015

1016 Image analysis was conducted with a customized CellProfiler 4.2.1. (Carpenter et al.,  
1017 2006; Stirling et al., 2021) pipeline. In short, nuclei and nucleoli objects were  
1018 segmented from DAPI and NPM1 channels, respectively, using the three-class Otsu  
1019 thresholding method, excluding objects touching the image's border. Next, the nuclei  
1020 objects were masked by nucleoli objects, thus creating the third class of objects –  
1021 masked nuclei, consisting solely of nucleoplasm without nucleoli. The relationship of  
1022 each nucleolus object to its parent nucleus object was assigned using the  
1023 RelateObjects module. Finally, CHIP intensity was calculated from the CHIP channel  
1024 for both masked nuclei and nucleoli objects and exported together with the  
1025 relationship information to CSV files. For each repetition of the experiment, the ratio  
1026 of each child nucleolus/parent masked nucleus mean intensities was calculated.  
1027 Nucleoli without assigned parent nucleus (parent ID 0) were discarded from the  
1028 analysis.

1029

#### 1030 FRAP

1031

1032 Cells used in FRAP studies were cultured on 35-mm imaging dishes (Ibidi). FRAP  
1033 experiments were performed on ZEISS LSM800 confocal laser scanning microscope  
1034 equipped with the 40x/1.3 NA oil immersion objective. A circular region of interest of  
1035 the constant size was selected within nucleoli, and bleaching was carried out with  
1036 100% laser power of the 488 nm laser line. Fluorescence intensity was recorded for  
1037 up to 3 min at a frame interval of 0.5 s. FRAP movies were analyzed using  
1038 FRAPAnalyser (<https://github.com/ssgpers/FRAPAnalyser>). Fluorescence intensity  
1039 was corrected for background fluorescence and photobleaching. Recovery curves  
1040 were fitted with a single exponential recovery.

1041

#### 1042 Nucleoli isolation

1043

1044 Cells grown on 100 mm tissue culture dishes were harvested on ice. The isolation of  
1045 nucleoli was performed according to the previously described protocol with some  
1046 modifications (Andersen et al., 2002). The old medium was discarded, and the cells  
1047 were washed 1× with 4 ml of ice-cold PBS. Cells were harvested on ice in cold PBS.  
1048 The cells were washed 1× with ice-cold PBS at 220 × g at 4°C. After the PBS wash,  
1049 the cells were resuspended in 5 ml of Buffer A (10 mM HEPES pH 7.9, 10 mM KCl,  
1050 1.5 mM MgCl<sub>2</sub>, 0.5 mM DTT, 1x Complete protease inhibitor cocktail (Roche)) and  
1051 incubated on ice for 5 min. The cells were homogenized with a pre-cooled 1 ml  
1052 Dounce homogenizer (Wheaton) on ice 10× using a tight pestle. The homogenized  
1053 cells were centrifuged at 220 × g for 5 min at 4°C. The supernatant was collected as  
1054 the cytoplasmic fraction. The pellet was resuspended with 3 ml S1 solution (0.25 M  
1055 sucrose, 10 mM MgCl<sub>2</sub>, 1x Complete protease inhibitor cocktail (Roche)) by pipetting  
1056 up and down. The resuspended pellet was layered carefully over 3 ml of S2 solution  
1057 (0.35 M sucrose, 0.5 mM MgCl<sub>2</sub>, 1x Complete protease inhibitor cocktail (Roche))  
1058 and centrifuged at 1430 × g for 5 min at 4°C. The pellet was resuspended with 3 ml  
1059 of S2 solution by pipetting up and down. The nuclear suspension was sonicated on  
1060 the ice at 50% power 11×, each time for 10 s and 10 s of rest on ice (Sonica VCX130  
1061 with a ¼ inch tip). The sonicated sample was layered over 3 ml of S3 solution  
1062 (0.88 M sucrose, 0.5 mM MgCl<sub>2</sub>, 1x Complete protease inhibitor cocktail (Roche)) in  
1063 a new Falcon tube and centrifuged at 3000 × g for 10 min at 4°C. The supernatant  
1064 was collected as the nucleoplasm fraction. The pellet was resuspended with 500 µl of  
1065 S2 solution and centrifuged at 1430 × g for 5 min at 4°C. The nucleoli were  
1066 resuspended in 500 µL of S2 solution and stored at –80°C as nucleoli fractions.  
1067

#### 1068 Estimation of the protein concentration and Western blotting

1069  
1070 The protein concentration was estimated using the BCA protein assay kit (23225,  
1071 Thermo Scientific). Protein samples in SDS-loading dye (reducing) were run in 10%  
1072 acrylamide gels in a running buffer (25 mM Tris, 190 mM glycine, 0.1% SDS) at 90 V  
1073 (stacking gel) and 150 V (separating gel). The wet transfer was done at a constant  
1074 400 mA for 1 h at 4°C in a transfer buffer (25 mM Tris, 190 mM glycine, 20%  
1075 methanol, pH 8.3). Blots were blocked with 5% skimmed milk in TBST (50 mM Tris,  
1076 150 mM NaCl, 0.1% Tween 20, pH 7.6) for 1 h at room temperature and incubated  
1077 overnight with primary antibodies prepared in 5% skimmed milk in TBST at 4°C. The  
1078 blots were then washed three times with TBST for 10 min each wash. Finally, the  
1079 blots were incubated with horseradish peroxidase-linked secondary antibodies  
1080 (1:10000) prepared in 5% skimmed milk in TBST for 1 h at room temperature.  
1081 Imaging was performed using a ChemiDoc<sup>TM</sup> Imaging System (Bio-Rad).  
1082

#### 1083 Antibodies:

- 1084     ▪ CHIP (1: 1000) rabbit [EPR4447] (ab134064) Abcam
- 1085     ▪ FBL (1: 500) rabbit (2639S) Cell Signaling Technology
- 1086     ▪ Alpha-tubulin (1: 1000) mouse (32-2500) Invitrogen
- 1087     ▪ Lamin B1 (1: 1000) mouse (33-2000) Invitrogen
- 1088     ▪ HSP70 (1: 500) mouse (SMC-100) StressMarq Biosciences

#### 1089 In vitro ubiquitination assay

1090  
1091  
1092 The reactions were run at 37°C for 90 min using 60 µM Ubiquitin (Boston Biochem) in  
1093 the presence of 100 nM E1 (UBE1, Boston Biochem), 0.6 µM E2 (Boston Biochem),

1094 E3 ligase reaction buffer (Boston Biochem), and ATP in 25  $\mu$ l reaction mixture. 2  $\mu$ l  
1095 cell lysates served as a source of the E3 ligase CHIP (cells were lysed in Cell lysis  
1096 buffer (9803, Cell Signaling Technology). After reactions, protein samples were  
1097 mixed with the SDS-loading dye and boiled for Western blot analysis.

1098

### 1099 Statistical analysis

1100

1101 Data were plotted and analyzed with the GraphPad Prism 9 software. P-values were  
1102 calculated using a two-way or one way ANOVA followed by multiple comparisons  
1103 tests. Two-tailed unpaired t-test or Mann-Whitney test were used to compare  
1104 differences between two independent groups. In the figures, \* =  $p < 0.05$ , \*\* =  $p <$   
1105  $0.01$ , \*\*\* =  $p < 0.001$ , \*\*\*\* =  $p < 0.0001$ .

1106

1107

1108

1109

## 1110 **ACKNOWLEDGEMENTS**

1111

1112 We thank the Genome Engineering Unit of the International Institute of Molecular and  
1113 Cell Biology in Warsaw for generating DNA constructs. We thank the Microscopy and  
1114 Cytometry Facility of the International Institute of Molecular and Cell Biology in  
1115 Warsaw for assistance with the confocal microscopy. We thank Aleksandra  
1116 Szybińska for optimizing the HSP70 knockdown in HeLa EGFP-CHIP cells. We thank  
1117 members of the Pokrzywa laboratory for discussions and comments on the  
1118 manuscript.

1119

## 1120 **FUNDING**

1121

1122 Foundation for Polish Science, co-financed by the European Union under the  
1123 European Regional Development Fund (grant POIR.04.04.00-00-5EAB/18-00)  
1124 and Norwegian Financial Mechanism 2014-2021 and operated by the Polish National  
1125 Science Center under the project contract no UMO-2019/34/H/NZ3/00691.

1126

## 1127 **CONFLICT OF INTEREST**

1128

1129 The authors declare that the research was conducted without any commercial or  
1130 financial relationships that could be construed as a potential conflict of interest.

1131

## 1132 **AUTHOR CONTRIBUTIONS**

1133

1134 Contributions of individual authors based on the [CRediT](#) (Contributor Roles  
1135 Taxonomy).

1136

1137 **Malgorzata Piechota:** Conceptualization; Data curation; Formal analysis;  
1138 Methodology; Investigation; Validation; Visualization; Supervision; Validation; Writing-  
1139 original draft; Writing-review & editing. **Lilla Biriczova:** Formal analysis;  
1140 Investigation; Methodology; Visualization; Writing-review & editing. **Konrad**  
1141 **Kowalski:** Formal analysis; Investigation; Methodology; Visualization; Writing-review  
1142 & editing. **Natalia A. Szulc:** Formal analysis; Writing-review & editing. **Wojciech**

1143 **Pokrzywa:** Conceptualization; Data curation; Formal analysis; Funding acquisition;  
1144 Project administration; Resources; Supervision; Validation; Writing-original draft;  
1145 Writing-review & editing.

1146

## 1147 REFERENCES

1148

1149 Alberti, S., and Carra, S. (2019). Nucleolus: A Liquid Droplet Compartment for  
1150 Misbehaving Proteins. *Curr Biol* 29(19), R930-r932. doi:  
1151 10.1016/j.cub.2019.08.013.

1152 Andersen, J.S., Lyon, C.E., Fox, A.H., Leung, A.K., Lam, Y.W., Steen, H., et al.  
1153 (2002). Directed proteomic analysis of the human nucleolus. *Curr Biol* 12(1),  
1154 1-11. doi: 10.1016/s0960-9822(01)00650-9.

1155 Audas, T.E., Jacob, M.D., and Lee, S. (2012). Immobilization of proteins in the  
1156 nucleolus by ribosomal intergenic spacer noncoding RNA. *Mol Cell* 45(2), 147-  
1157 157. doi: 10.1016/j.molcel.2011.12.012.

1158 Azkanaz, M., Rodríguez López, A., de Boer, B., Huiting, W., Angrand, P.O.,  
1159 Vellenga, E., et al. (2019). Protein quality control in the nucleolus safeguards  
1160 recovery of epigenetic regulators after heat shock. *Elife* 8. doi:  
1161 10.7554/eLife.45205.

1162 Ballinger, C.A., Connell, P., Wu, Y., Hu, Z., Thompson, L.J., Yin, L.Y., et al. (1999).  
1163 Identification of CHIP, a novel tetratricopeptide repeat-containing protein that  
1164 interacts with heat shock proteins and negatively regulates chaperone  
1165 functions. *Mol Cell Biol* 19(6), 4535-4545. doi: 10.1128/mcb.19.6.4535.

1166 Biggiogera, M., Bürki, K., Kaufmann, S.H., Shaper, J.H., Gas, N., Amalric, F., et al.  
1167 (1990). Nucleolar distribution of proteins B23 and nucleolin in mouse  
1168 preimplantation embryos as visualized by immunoelectron microscopy.  
1169 *Development* 110(4), 1263-1270. doi: 10.1242/dev.110.4.1263.

1170 Bolte, S., and Cordelières, F.P. (2006). A guided tour into subcellular colocalization  
1171 analysis in light microscopy. *J Microsc* 224(Pt 3), 213-232. doi:  
1172 10.1111/j.1365-2818.2006.01706.x.

1173 Buetow, L., and Huang, D.T. (2016). Structural insights into the catalysis and  
1174 regulation of E3 ubiquitin ligases. *Nat Rev Mol Cell Biol* 17(10), 626-642. doi:  
1175 10.1038/nrm.2016.91.

1176 Carpenter, A.E., Jones, T.R., Lamprecht, M.R., Clarke, C., Kang, I.H., Friman, O., et  
1177 al. (2006). CellProfiler: image analysis software for identifying and quantifying  
1178 cell phenotypes. *Genome Biol* 7(10), R100. doi: 10.1186/gb-2006-7-10-r100.

1179 Cerqueira, A.V., and Lemos, B. (2019). Ribosomal DNA and the Nucleolus as  
1180 Keystones of Nuclear Architecture, Organization, and Function. *Trends Genet*  
1181 35(10), 710-723. doi: 10.1016/j.tig.2019.07.011.

1182 Dai, Q., Zhang, C., Wu, Y., McDonough, H., Whaley, R.A., Godfrey, V., et al. (2003).  
1183 CHIP activates HSF1 and confers protection against apoptosis and cellular  
1184 stress. *Embo j* 22(20), 5446-5458. doi: 10.1093/emboj/cdg529.

1185 Das, A., Thapa, P., Santiago, U., Shanmugam, N., Banasiak, K., Dabrowska, K., et  
1186 al. (2021). Heterotypic Assembly Mechanism Regulates CHIP E3 Ligase  
1187 Activity. *bioRxiv*, 2021.2008.2020.457118. doi: 10.1101/2021.08.20.457118.

1188 Demand, J., Alberti, S., Patterson, C., and Höfheld, J. (2001). Cooperation of a  
1189 ubiquitin domain protein and an E3 ubiquitin ligase during  
1190 chaperone/proteasome coupling. *Curr Biol* 11(20), 1569-1577. doi:  
1191 10.1016/s0960-9822(01)00487-0.



- 1192 Feric, M., Vaidya, N., Harmon, T.S., Mitrea, D.M., Zhu, L., Richardson, T.M., et al.  
1193 (2016). Coexisting Liquid Phases Underlie Nucleolar Subcompartments. *Cell*  
1194 165(7), 1686-1697. doi: 10.1016/j.cell.2016.04.047.
- 1195 Frottin, F., Schueder, F., Tiwary, S., Gupta, R., Körner, R., Schlichthaerle, T., et al.  
1196 (2019). The nucleolus functions as a phase-separated protein quality control  
1197 compartment. *Science* 365(6451), 342-347. doi: 10.1126/science.aaw9157.
- 1198 Hatakeyama, S., Yada, M., Matsumoto, M., Ishida, N., and Nakayama, K.I. (2001). U  
1199 box proteins as a new family of ubiquitin-protein ligases. *J Biol Chem* 276(35),  
1200 33111-33120. doi: 10.1074/jbc.M102755200.
- 1201 Huang, S. (2002). Building an efficient factory: where is pre-rRNA synthesized in the  
1202 nucleolus? *J Cell Biol* 157(5), 739-741. doi: 10.1083/jcb.200204159.
- 1203 Jiang, J., Ballinger, C.A., Wu, Y., Dai, Q., Cyr, D.M., Höfheld, J., et al. (2001). CHIP  
1204 is a U-box-dependent E3 ubiquitin ligase: identification of Hsc70 as a target for  
1205 ubiquitylation. *J Biol Chem* 276(46), 42938-42944. doi:  
1206 10.1074/jbc.M101968200.
- 1207 Jordan, E.G. (1984). Nucleolar nomenclature. *J Cell Sci* 67, 217-220. doi:  
1208 10.1242/jcs.67.1.217.
- 1209 Joshi, V., Amanullah, A., Upadhyay, A., Mishra, R., Kumar, A., and Mishra, A. (2016).  
1210 A Decade of Boon or Burden: What Has the CHIP Ever Done for Cellular  
1211 Protein Quality Control Mechanism Implicated in Neurodegeneration and  
1212 Aging? *Front Mol Neurosci* 9, 93. doi: 10.3389/fnmol.2016.00093.
- 1213 Kampinga, H.H., Kanon, B., Salomons, F.A., Kabakov, A.E., and Patterson, C.  
1214 (2003). Overexpression of the cochaperone CHIP enhances Hsp70-  
1215 dependent folding activity in mammalian cells. *Mol Cell Biol* 23(14), 4948-  
1216 4958. doi: 10.1128/MCB.23.14.4948-4958.2003.
- 1217 Komander, D. (2009). The emerging complexity of protein ubiquitination. *Biochem*  
1218 *Soc Trans* 37(Pt 5), 937-953. doi: 10.1042/bst0370937.
- 1219 Kozakai, Y., Kamada, R., Furuta, J., Kiyota, Y., Chuman, Y., and Sakaguchi, K.  
1220 (2016). PPM1D controls nucleolar formation by up-regulating phosphorylation  
1221 of nucleophosmin. *Sci Rep* 6, 33272. doi: 10.1038/srep33272.
- 1222 Krüger, T., Zentgraf, H., and Scheer, U. (2007). Intranucleolar sites of ribosome  
1223 biogenesis defined by the localization of early binding ribosomal proteins. *J*  
1224 *Cell Biol* 177(4), 573-578. doi: 10.1083/jcb.200612048.
- 1225 Lafontaine, D.L.J., Riback, J.A., Bascetin, R., and Brangwynne, C.P. (2021). The  
1226 nucleolus as a multiphase liquid condensate. *Nat Rev Mol Cell Biol* 22(3), 165-  
1227 182. doi: 10.1038/s41580-020-0272-6.
- 1228 Latonen, L., Moore, H.M., Bai, B., Jäämaa, S., and Laiho, M. (2011). Proteasome  
1229 inhibitors induce nucleolar aggregation of proteasome target proteins and  
1230 polyadenylated RNA by altering ubiquitin availability. *Oncogene* 30(7), 790-  
1231 805. doi: 10.1038/onc.2010.469.
- 1232 Lindström, M.S., Jurada, D., Bursac, S., Orsolich, I., Bartek, J., and Volarevic, S.  
1233 (2018). Nucleolus as an emerging hub in maintenance of genome stability and  
1234 cancer pathogenesis. *Oncogene* 37(18), 2351-2366. doi: 10.1038/s41388-  
1235 017-0121-z.
- 1236 Marques, C., Guo, W., Pereira, P., Taylor, A., Patterson, C., Evans, P.C., et al.  
1237 (2006). The triage of damaged proteins: degradation by the ubiquitin-  
1238 proteasome pathway or repair by molecular chaperones. *Faseb j* 20(6), 741-  
1239 743. doi: 10.1096/fj.05-5080fje.

- 1240 Meacham, G.C., Patterson, C., Zhang, W., Younger, J.M., and Cyr, D.M. (2001). The  
1241 Hsc70 co-chaperone CHIP targets immature CFTR for proteasomal  
1242 degradation. *Nat Cell Biol* 3(1), 100-105. doi: 10.1038/35050509.
- 1243 Mediani, L., Guillén-Boixet, J., Vinet, J., Franzmann, T.M., Bigi, I., Mateju, D., et al.  
1244 (2019). Defective ribosomal products challenge nuclear function by impairing  
1245 nuclear condensate dynamics and immobilizing ubiquitin. *Embo j* 38(15),  
1246 e101341. doi: 10.15252/embj.2018101341.
- 1247 Mekhail, K., Khacho, M., Carrigan, A., Hache, R.R., Gunaratnam, L., and Lee, S.  
1248 (2005). Regulation of ubiquitin ligase dynamics by the nucleolus. *J Cell Biol*  
1249 170(5), 733-744. doi: 10.1083/jcb.200506030.
- 1250 Mitrea, D.M., Cika, J.A., Stanley, C.B., Nourse, A., Onuchic, P.L., Banerjee, P.R., et  
1251 al. (2018). Self-interaction of NPM1 modulates multiple mechanisms of liquid-  
1252 liquid phase separation. *Nat Commun* 9(1), 842. doi: 10.1038/s41467-018-  
1253 03255-3.
- 1254 Murata, S., Minami, Y., Minami, M., Chiba, T., and Tanaka, K. (2001). CHIP is a  
1255 chaperone-dependent E3 ligase that ubiquitylates unfolded protein. *EMBO*  
1256 *Rep* 2(12), 1133-1138. doi: 10.1093/embo-reports/kve246.
- 1257 Narayan, V., Landré, V., Ning, J., Hernychova, L., Muller, P., Verma, C., et al. (2015).  
1258 Protein-Protein Interactions Modulate the Docking-Dependent E3-Ubiquitin  
1259 Ligase Activity of Carboxy-Terminus of Hsc70-Interacting Protein (CHIP). *Mol*  
1260 *Cell Proteomics* 14(11), 2973-2987. doi: 10.1074/mcp.M115.051169.
- 1261 Nollen, E.A., Salomons, F.A., Brunsting, J.F., van der Want, J.J., Sibon, O.C., and  
1262 Kampinga, H.H. (2001). Dynamic changes in the localization of thermally  
1263 unfolded nuclear proteins associated with chaperone-dependent protection.  
1264 *Proc Natl Acad Sci U S A* 98(21), 12038-12043. doi:  
1265 10.1073/pnas.201112398.
- 1266 Pelham, H., Lewis, M., and Lindquist, S. (1984). Expression of a Drosophila heat  
1267 shock protein in mammalian cells: transient association with nucleoli after heat  
1268 shock. *Philos Trans R Soc Lond B Biol Sci* 307(1132), 301-307. doi:  
1269 10.1098/rstb.1984.0131.
- 1270 Pelham, H.R. (1984). Hsp70 accelerates the recovery of nucleolar morphology after  
1271 heat shock. *Embo j* 3(13), 3095-3100. doi: 10.1002/j.1460-  
1272 2075.1984.tb02264.x.
- 1273 Petrucelli, L., Dickson, D., Kehoe, K., Taylor, J., Snyder, H., Grover, A., et al. (2004).  
1274 CHIP and Hsp70 regulate tau ubiquitination, degradation and aggregation.  
1275 *Hum Mol Genet* 13(7), 703-714. doi: 10.1093/hmg/ddh083.
- 1276 Qian, S.B., McDonough, H., Boellmann, F., Cyr, D.M., and Patterson, C. (2006).  
1277 CHIP-mediated stress recovery by sequential ubiquitination of substrates and  
1278 Hsp70. *Nature* 440(7083), 551-555. doi: 10.1038/nature04600.
- 1279 Reynolds, R.C., Montgomery, P.O., and Hughes, B. (1964). NUCLEOLAR "CAPS"  
1280 PRODUCED BY ACTINOMYCIN D. *Cancer Res* 24, 1269-1277.
- 1281 Riback, J.A., Zhu, L., Ferrolino, M.C., Tolbert, M., Mitrea, D.M., Sanders, D.W., et al.  
1282 (2020). Composition-dependent thermodynamics of intracellular phase  
1283 separation. *Nature* 581(7807), 209-214. doi: 10.1038/s41586-020-2256-2.
- 1284 Rosser, M.F., Washburn, E., Muchowski, P.J., Patterson, C., and Cyr, D.M. (2007).  
1285 Chaperone functions of the E3 ubiquitin ligase CHIP. *J Biol Chem* 282(31),  
1286 22267-22277. doi: 10.1074/jbc.M700513200.
- 1287 Scheer, U., and Hock, R. (1999). Structure and function of the nucleolus. *Curr Opin*  
1288 *Cell Biol* 11(3), 385-390. doi: 10.1016/s0955-0674(99)80054-4.

- 1289 Schlecht, R., Scholz, S.R., Dahmen, H., Wegener, A., Sirrenberg, C., Musil, D., et al.  
1290 (2013). Functional analysis of Hsp70 inhibitors. *PLoS One* 8(11), e78443. doi:  
1291 10.1371/journal.pone.0078443.
- 1292 Schneider, C.A., Rasband, W.S., and Eliceiri, K.W. (2012). NIH Image to ImageJ: 25  
1293 years of image analysis. *Nat Methods* 9(7), 671-675. doi:  
1294 10.1038/nmeth.2089.
- 1295 Shav-Tal, Y., Blechman, J., Darzacq, X., Montagna, C., Dye, B.T., Patton, J.G., et al.  
1296 (2005). Dynamic sorting of nuclear components into distinct nucleolar caps  
1297 during transcriptional inhibition. *Mol Biol Cell* 16(5), 2395-2413. doi:  
1298 10.1091/mbc.e04-11-0992.
- 1299 Shimura, H., Schwartz, D., Gygi, S.P., and Kosik, K.S. (2004). CHIP-Hsc70 complex  
1300 ubiquitinates phosphorylated tau and enhances cell survival. *J Biol Chem*  
1301 279(6), 4869-4876. doi: 10.1074/jbc.M305838200.
- 1302 Smirnov, E., Borkovec, J., Kováčik, L., Svidenská, S., Schröfel, A., Skalníková, M., et  
1303 al. (2014). Separation of replication and transcription domains in nucleoli. *J*  
1304 *Struct Biol* 188(3), 259-266. doi: 10.1016/j.jsb.2014.10.001.
- 1305 Stankiewicz, M., Nikolay, R., Rybin, V., and Mayer, M.P. (2010). CHIP participates in  
1306 protein triage decisions by preferentially ubiquitinating Hsp70-bound  
1307 substrates. *Febs j* 277(16), 3353-3367. doi: 10.1111/j.1742-  
1308 4658.2010.07737.x.
- 1309 Stirling, D.R., Swain-Bowden, M.J., Lucas, A.M., Carpenter, A.E., Cimini, B.A., and  
1310 Goodman, A. (2021). CellProfiler 4: improvements in speed, utility and  
1311 usability. *BMC Bioinformatics* 22(1), 433. doi: 10.1186/s12859-021-04344-9.
- 1312 Szaflarski, W., Leńniczak-Staszak, M., Sowiński, M., Ojha, S., Aulas, A., Dave, D., et  
1313 al. (2022). Early rRNA processing is a stress-dependent regulatory event  
1314 whose inhibition maintains nucleolar integrity. *Nucleic Acids Res* 50(2), 1033-  
1315 1051. doi: 10.1093/nar/gkab1231.
- 1316 Szczesny, R.J., Kowalska, K., Klosowska-Kosicka, K., Chlebowski, A., Owczarek,  
1317 E.P., Warkocki, Z., et al. (2018). Versatile approach for functional analysis of  
1318 human proteins and efficient stable cell line generation using FLP-mediated  
1319 recombination system. *PLoS One* 13(3), e0194887. doi:  
1320 10.1371/journal.pone.0194887.
- 1321 Tateishi, Y., Kawabe, Y., Chiba, T., Murata, S., Ichikawa, K., Murayama, A., et al.  
1322 (2004). Ligand-dependent switching of ubiquitin-proteasome pathways for  
1323 estrogen receptor. *Embo j* 23(24), 4813-4823. doi: 10.1038/sj.emboj.7600472.
- 1324 Wang, M., Bokros, M., Theodoridis, P.R., and Lee, S. (2019). Nucleolar  
1325 Sequestration: Remodeling Nucleoli Into Amyloid Bodies. *Front Genet* 10,  
1326 1179. doi: 10.3389/fgene.2019.01179.
- 1327 Welch, W.J., and Feramisco, J.R. (1984). Nuclear and nucleolar localization of the  
1328 72,000-dalton heat shock protein in heat-shocked mammalian cells. *J Biol*  
1329 *Chem* 259(7), 4501-4513.
- 1330 Welch, W.J., and Suhan, J.P. (1986). Cellular and biochemical events in mammalian  
1331 cells during and after recovery from physiological stress. *J Cell Biol* 103(5),  
1332 2035-2052. doi: 10.1083/jcb.103.5.2035.
- 1333 Wu, X., and Hammer, J.A. (2021). ZEISS Airyscan: Optimizing Usage for Fast,  
1334 Gentle, Super-Resolution Imaging. *Methods Mol Biol* 2304, 111-130. doi:  
1335 10.1007/978-1-0716-1402-0\_5.
- 1336 Yang, K., Wang, M., Zhao, Y., Sun, X., Yang, Y., Li, X., et al. (2016). A redox  
1337 mechanism underlying nucleolar stress sensing by nucleophosmin. *Nat*  
1338 *Commun* 7, 13599. doi: 10.1038/ncomms13599.

- 1339 Yewdall, N.A., André, A.A.M., van Haren, M.H.I., Nelissen, F.H.T., Jonker, A., and  
1340 Spruijt, E. (2021). ATP:Mg<sup>2+</sup> shapes condensate properties of rRNA-NPM1 *in*  
1341 *vitro* nucleolus model and its partitioning of ribosomes. *bioRxiv*,  
1342 2021.2012.2022.473778. doi: 10.1101/2021.12.22.473778.  
1343 Younger, J.M., Ren, H.Y., Chen, L., Fan, C.Y., Fields, A., Patterson, C., et al. (2004).  
1344 A foldable CFTR{Delta}F508 biogenic intermediate accumulates upon  
1345 inhibition of the Hsc70-CHIP E3 ubiquitin ligase. *J Cell Biol* 167(6), 1075-1085.  
1346 doi: 10.1083/jcb.200410065.  
1347

A

bioRxiv preprint doi: <https://doi.org/10.1101/2022.05.17.492288>; this version posted May 17, 2022. The copyright holder for this preprint (which was not certified by peer review) is the author/funder, who has granted bioRxiv a license to display the preprint in perpetuity. It is made available under a [CC-BY 4.0 International license](#).

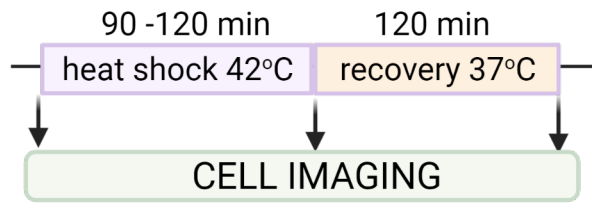

Created with BioRender.com

C

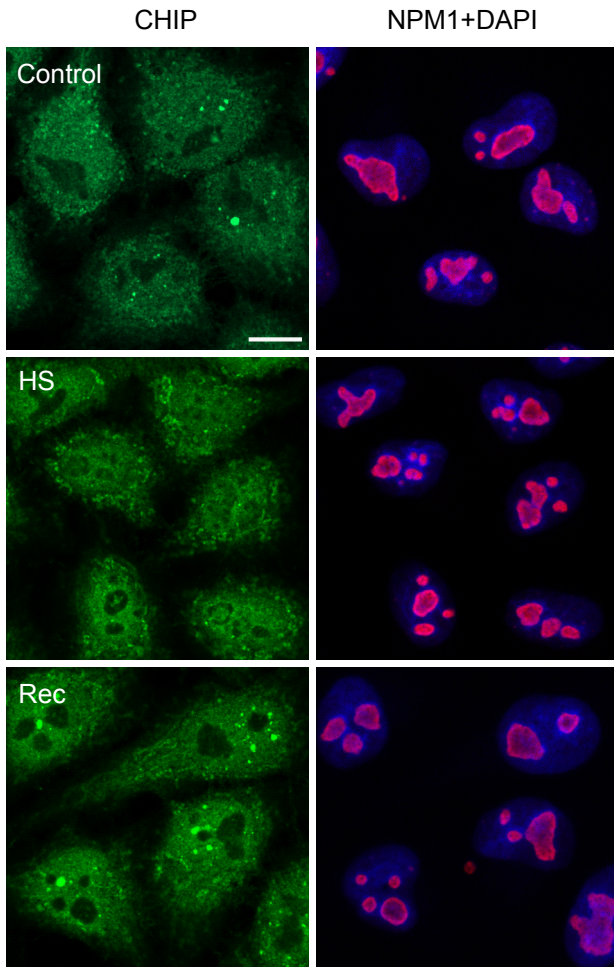

B

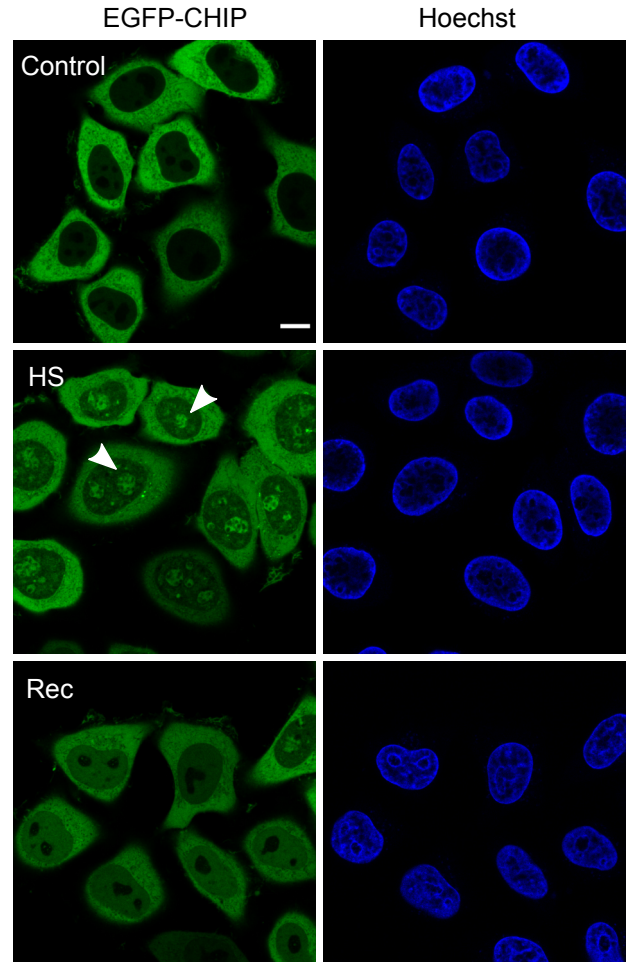

E

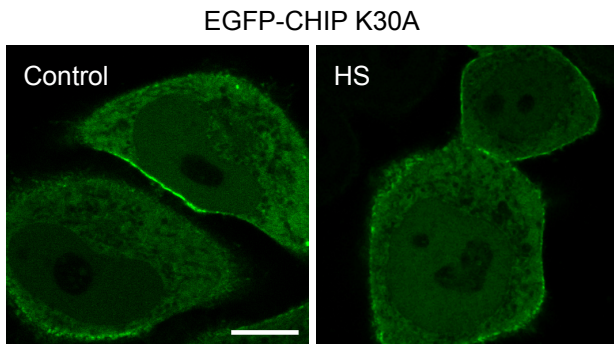

D

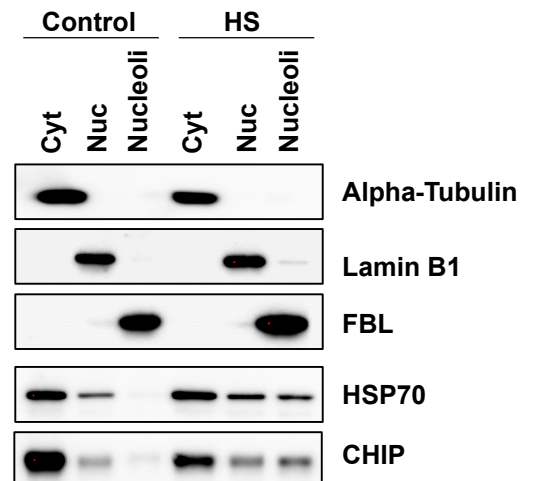

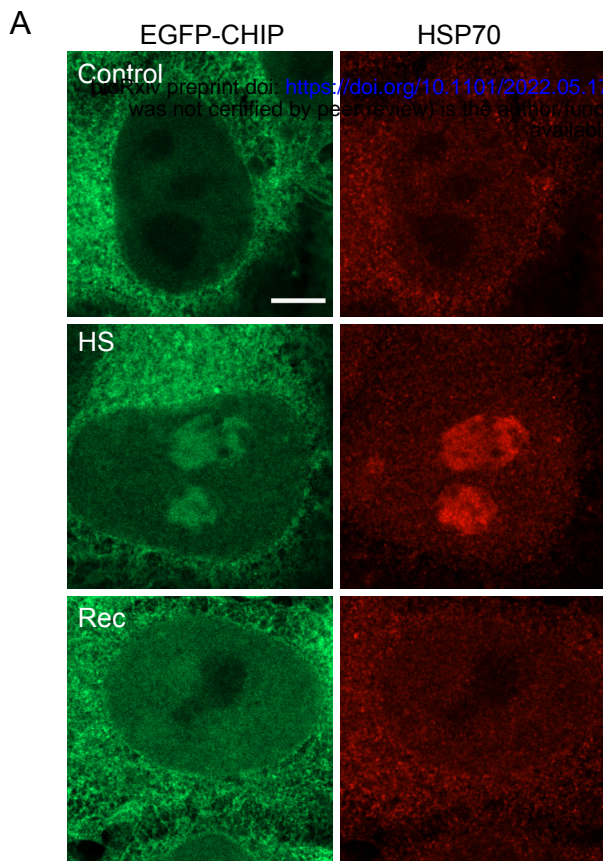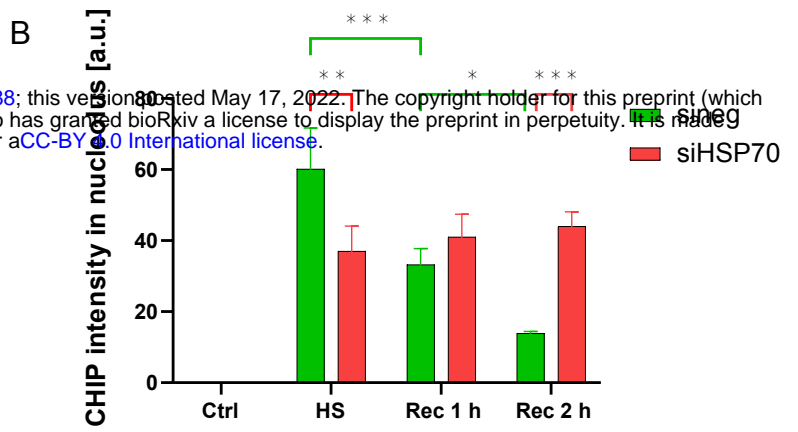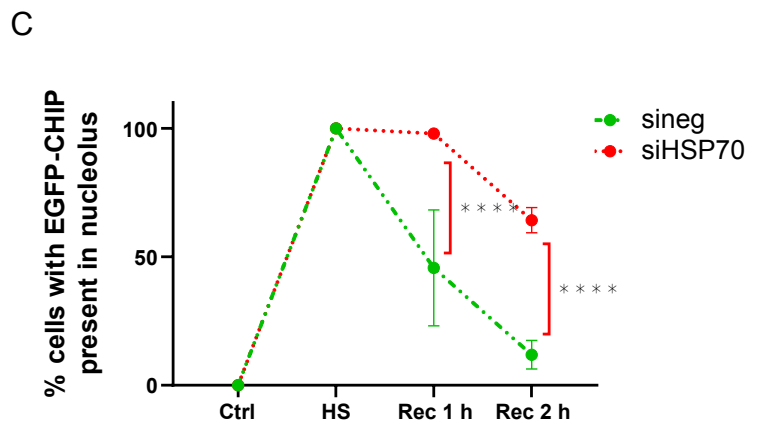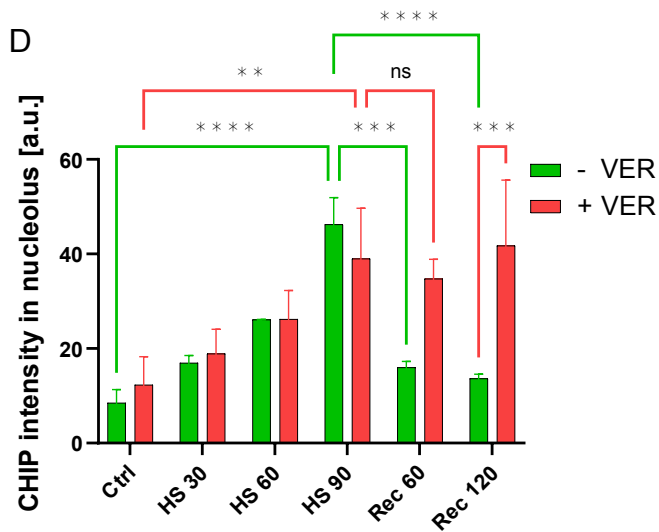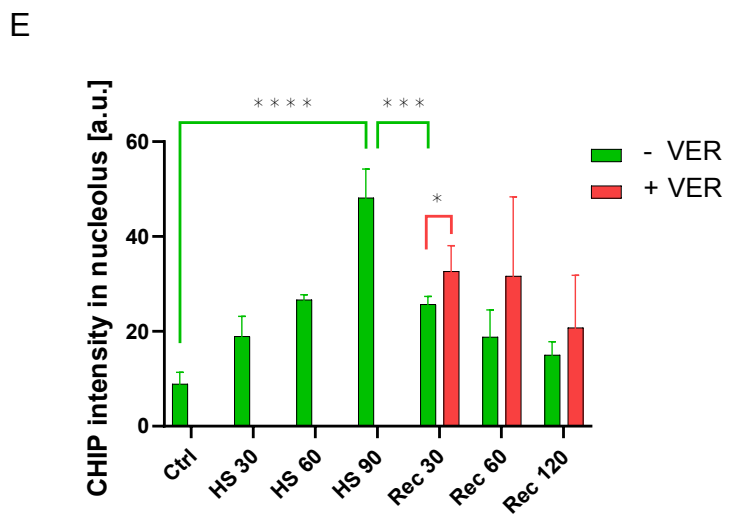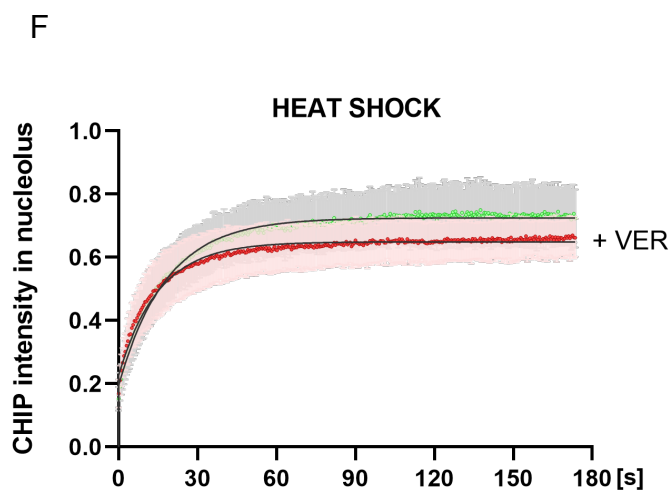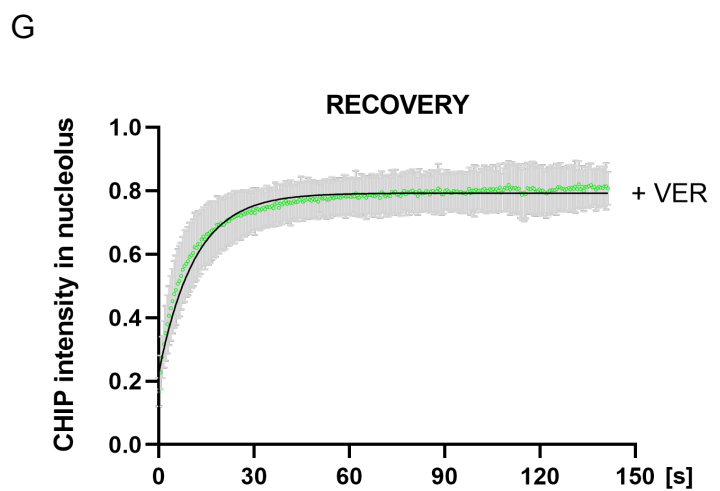

A

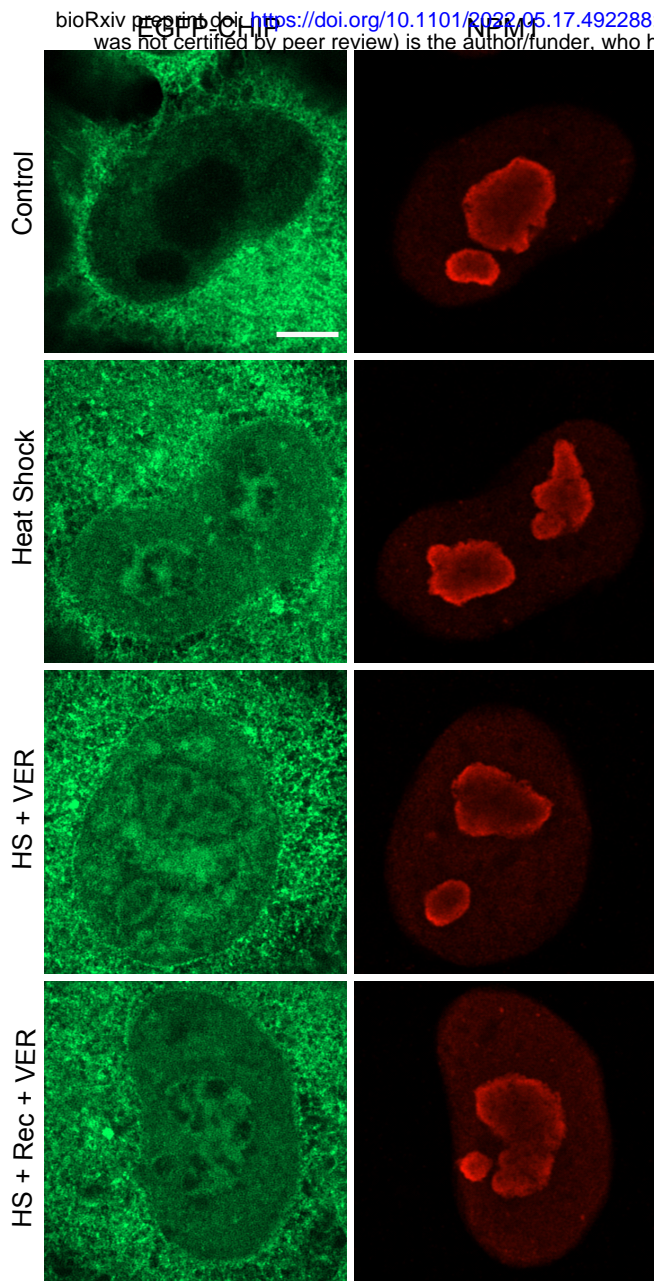

B

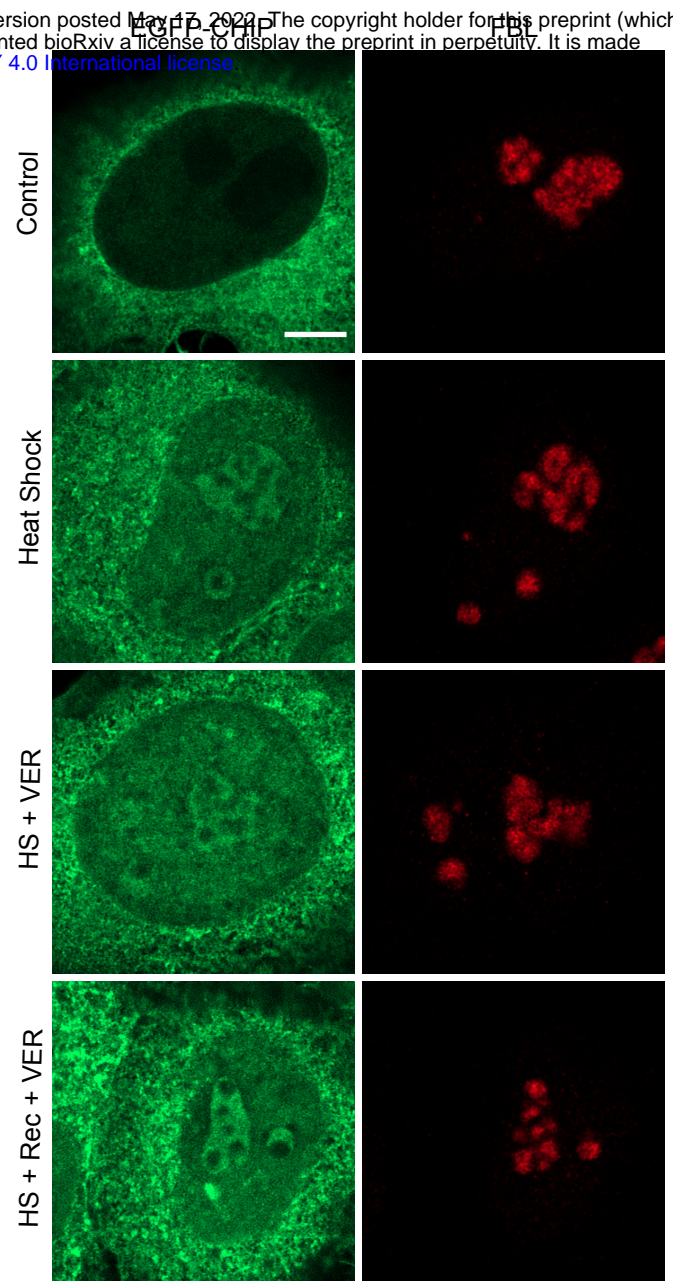

C

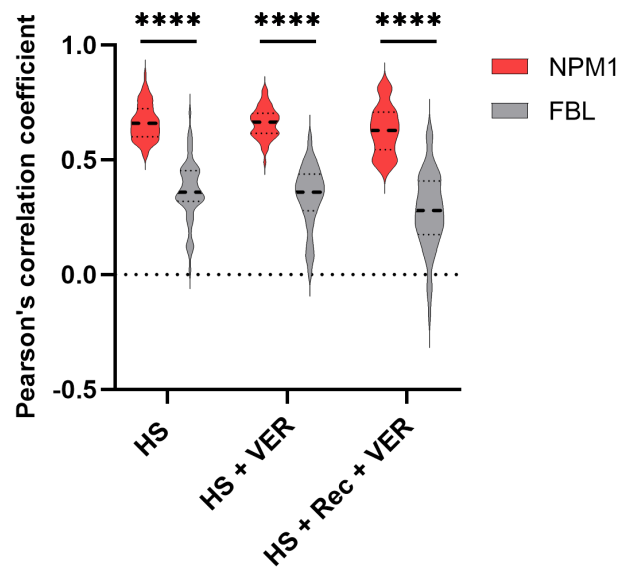

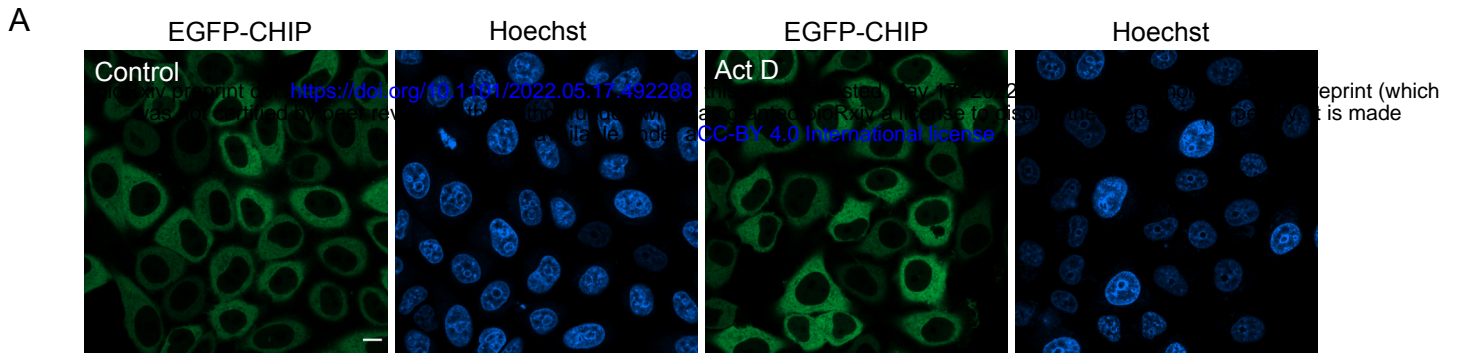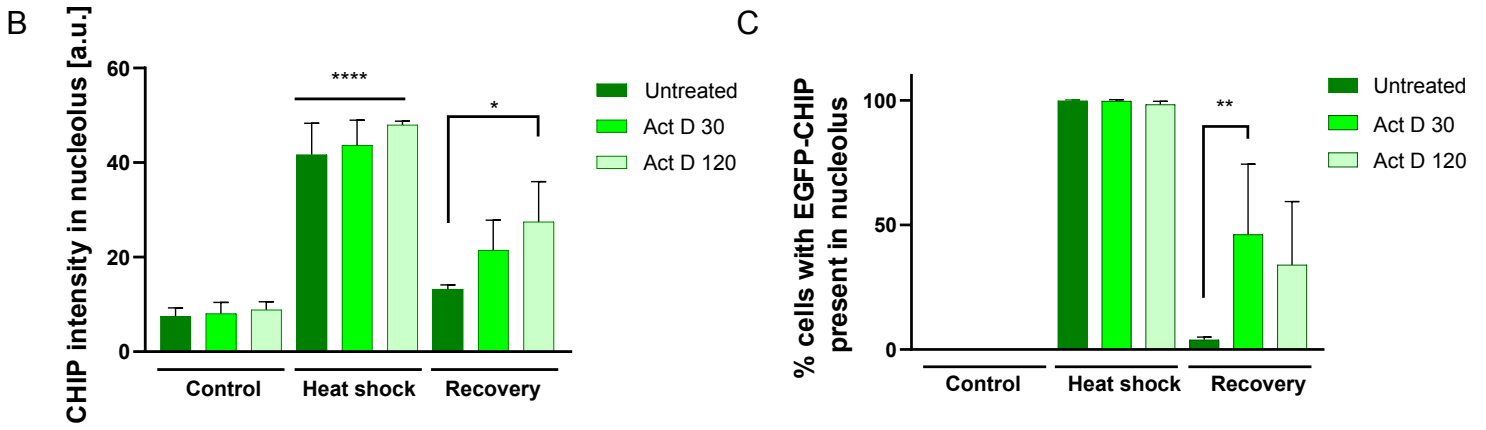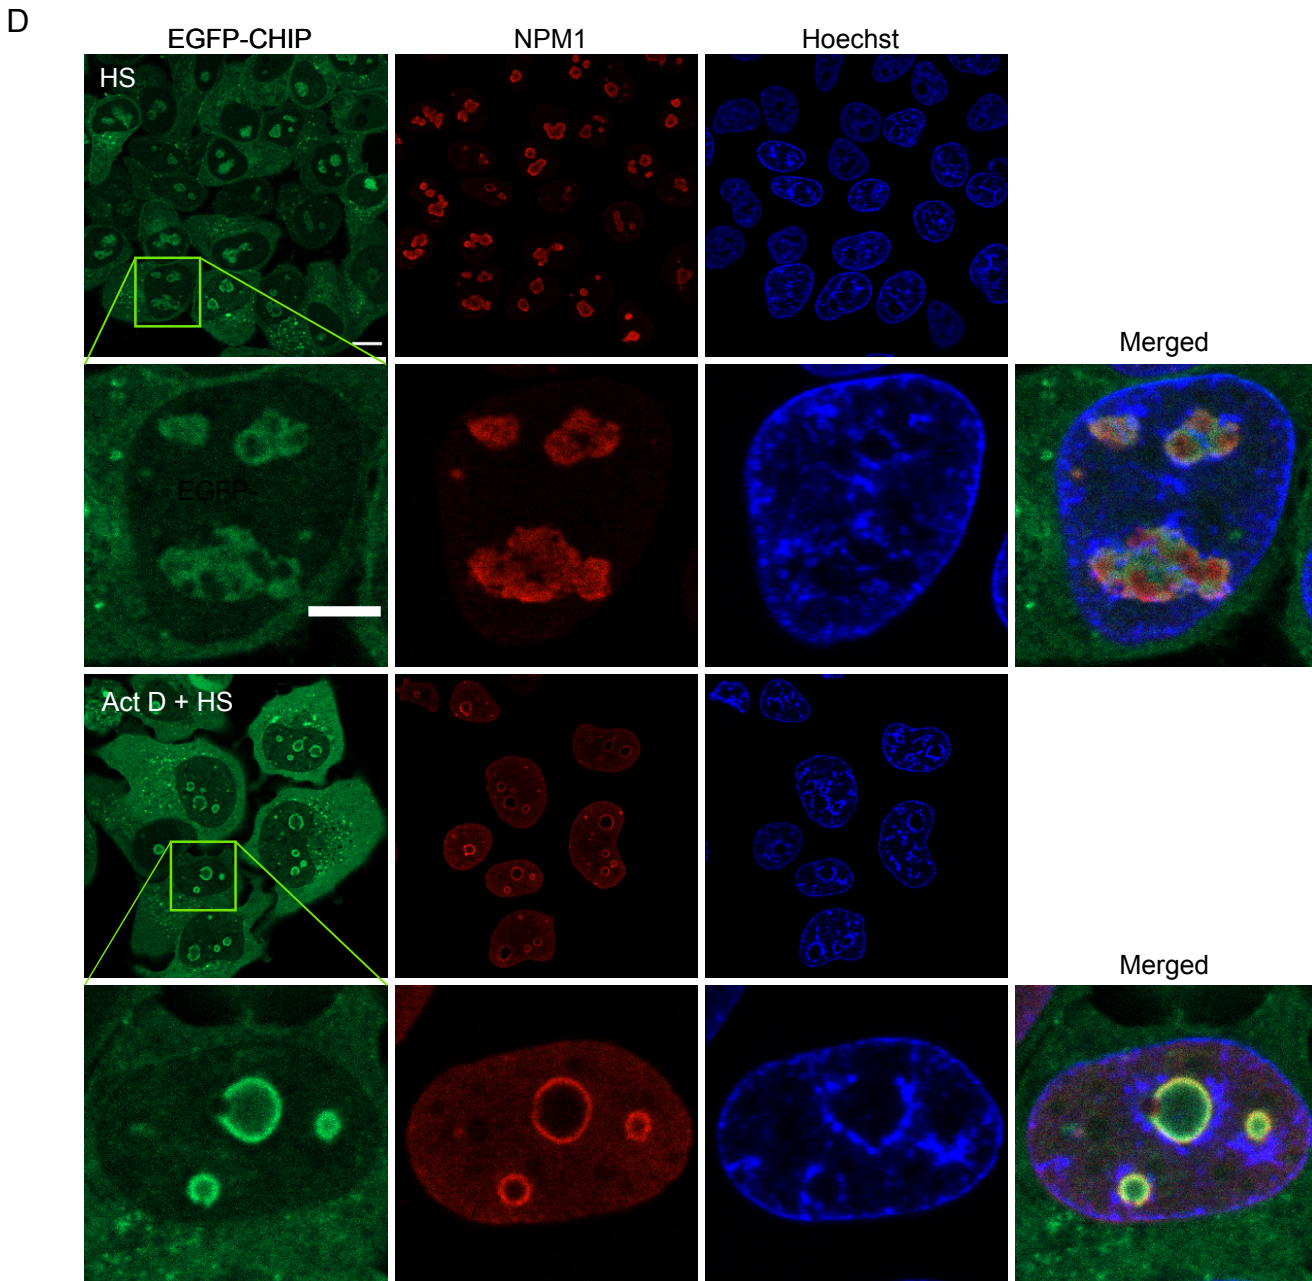



## EGFP-CHIP auto-ubiquitination

bioRxiv preprint doi: <https://doi.org/10.1101/2022.05.17.492288>; this version posted May 17, 2022. The copyright holder for this preprint (which was not certified by peer review) is the author/funder, who has granted bioRxiv a license to display the preprint in perpetuity. It is made available under a [CC-BY 4.0 International license](https://creativecommons.org/licenses/by/4.0/).

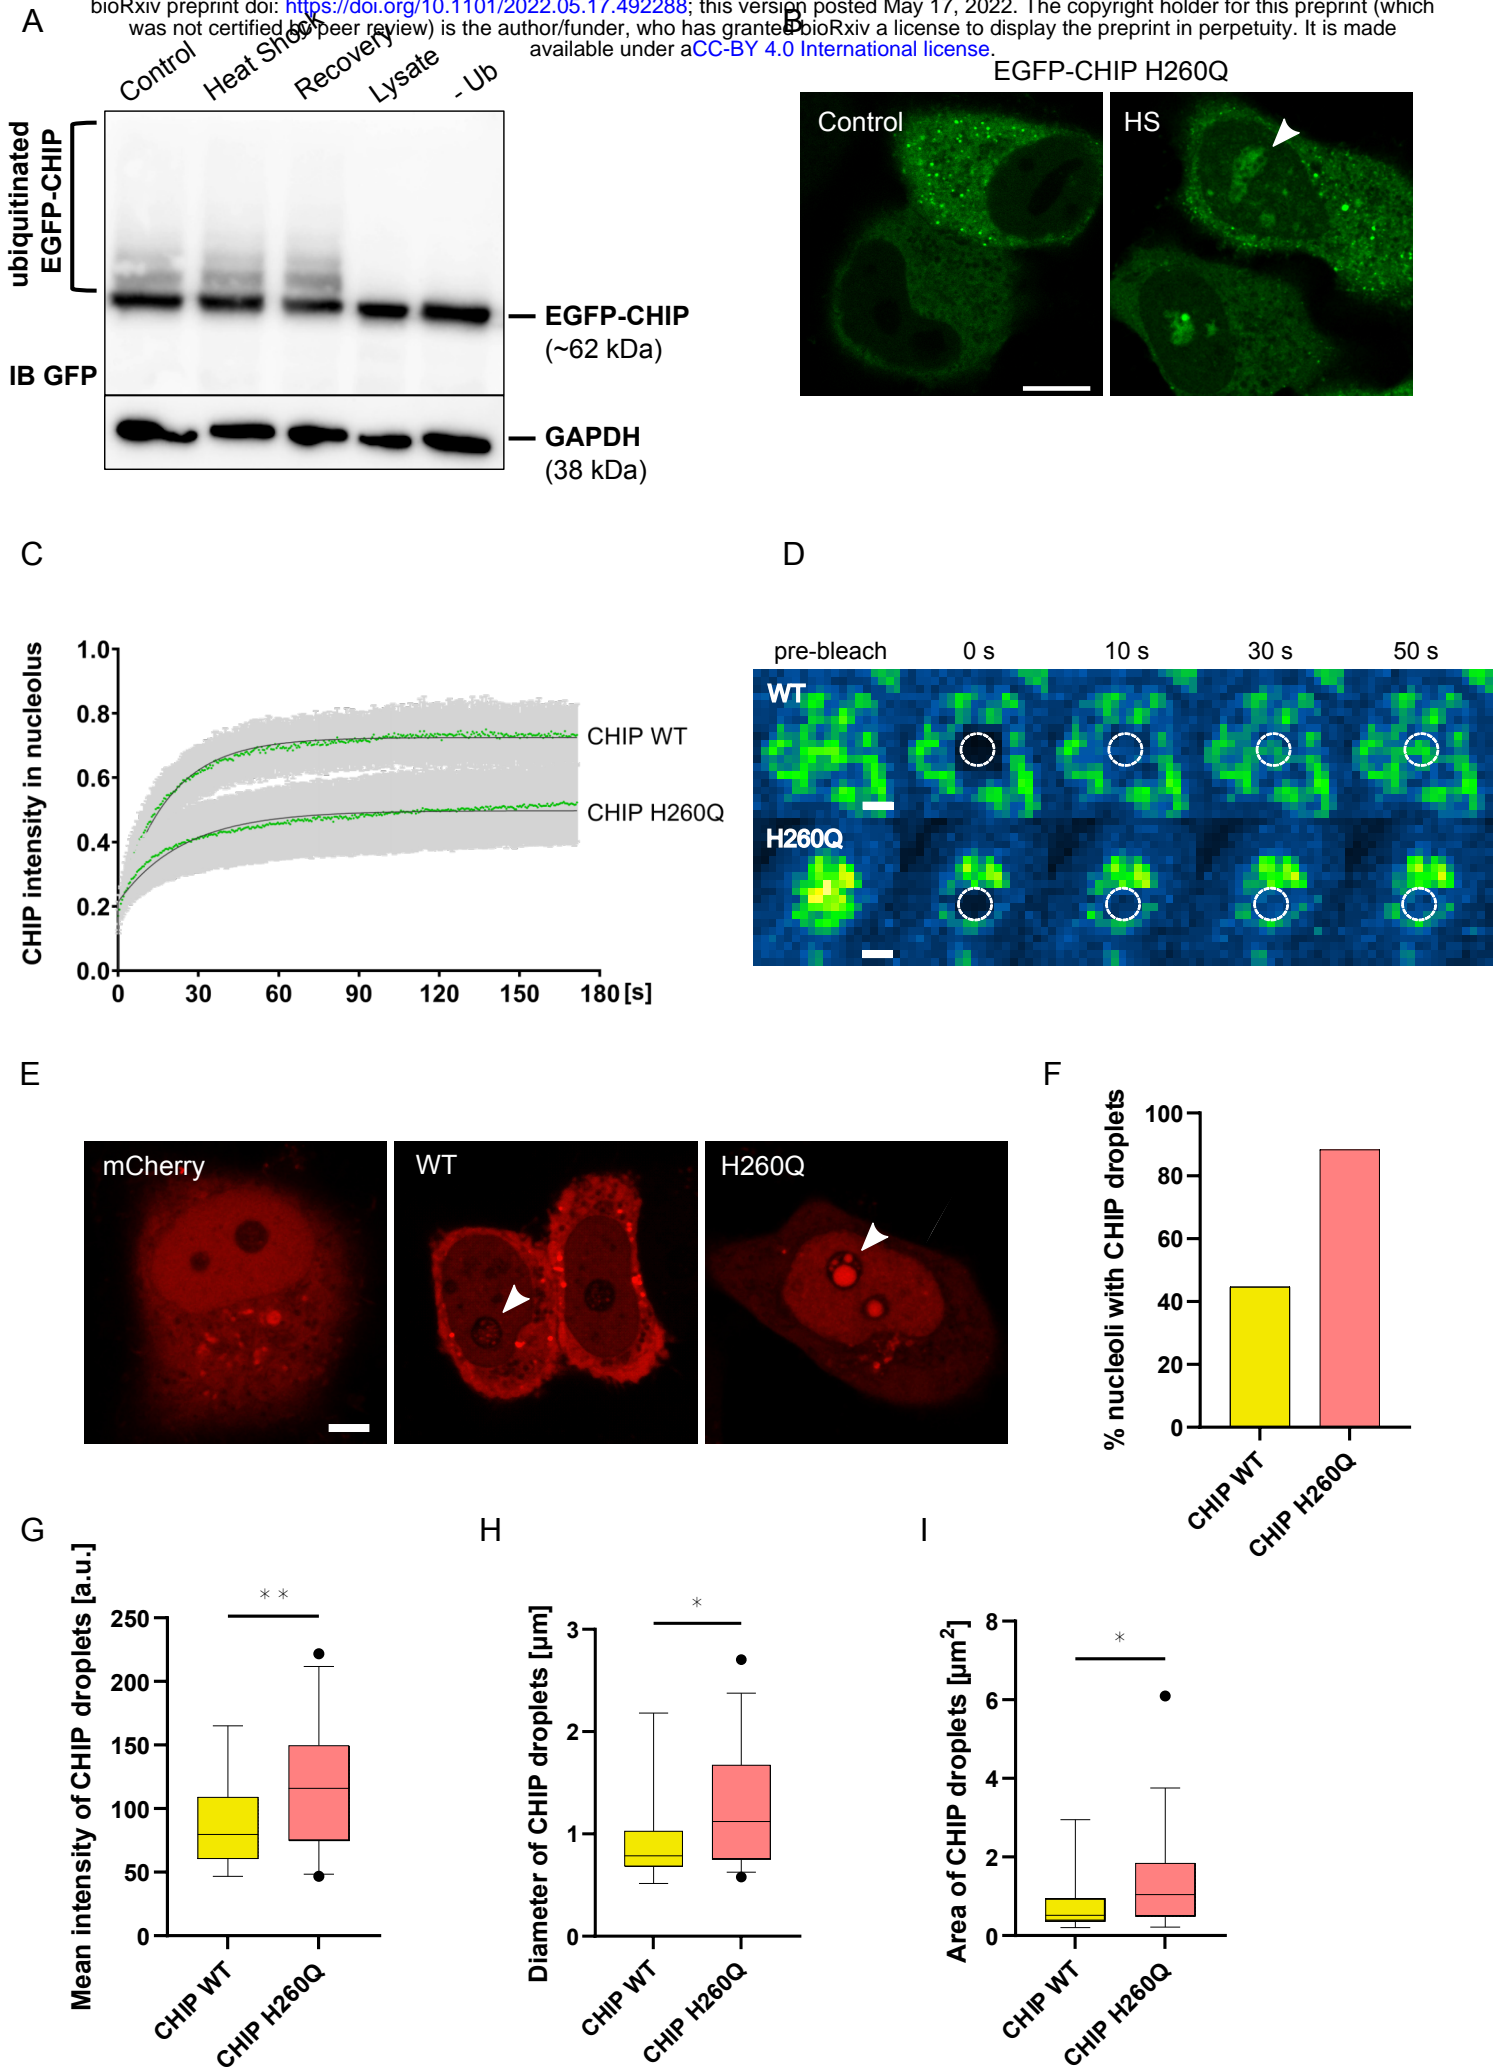

A

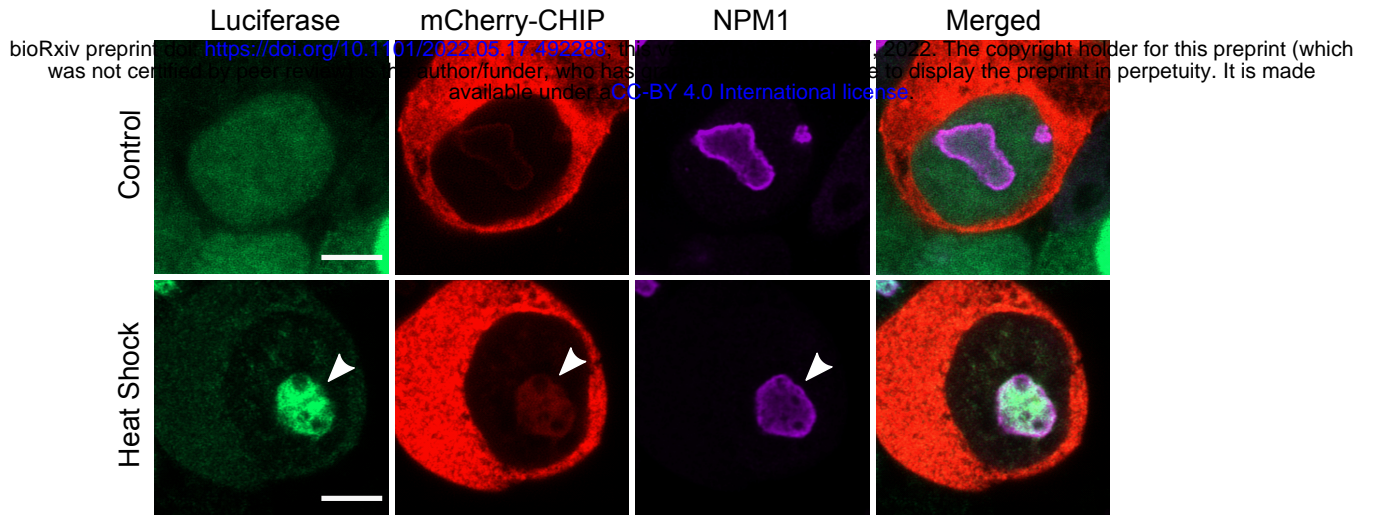

B

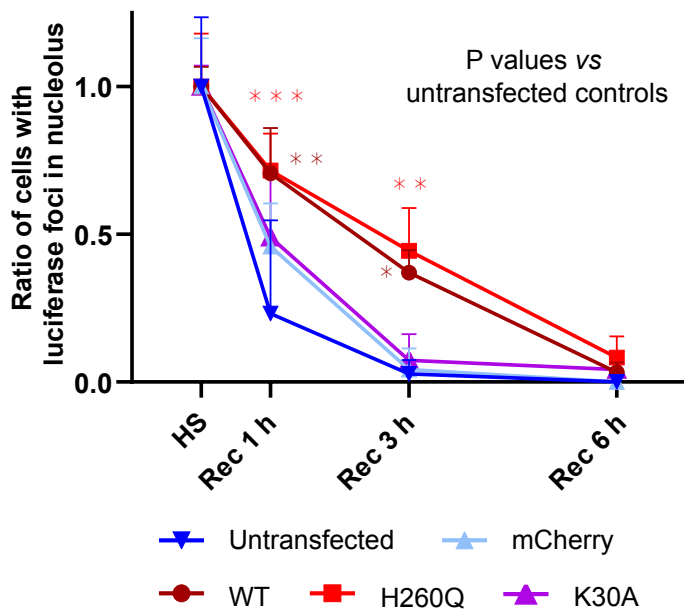

C

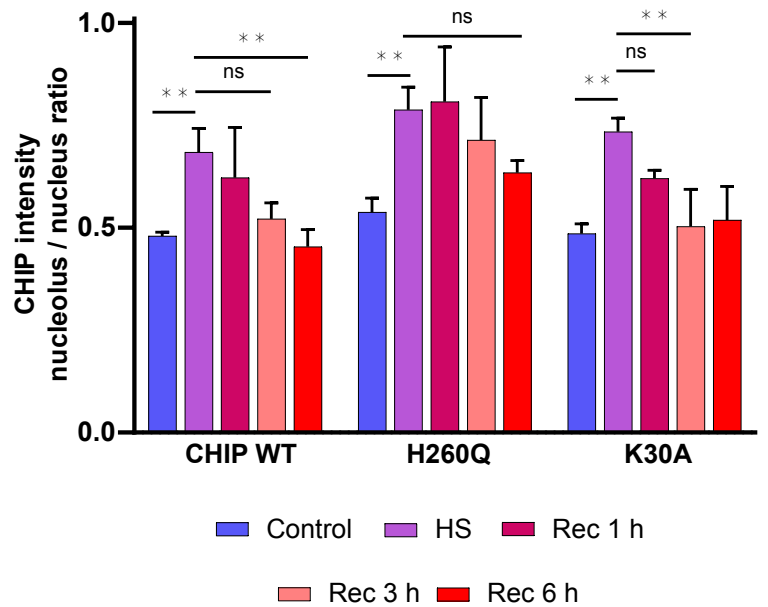

D

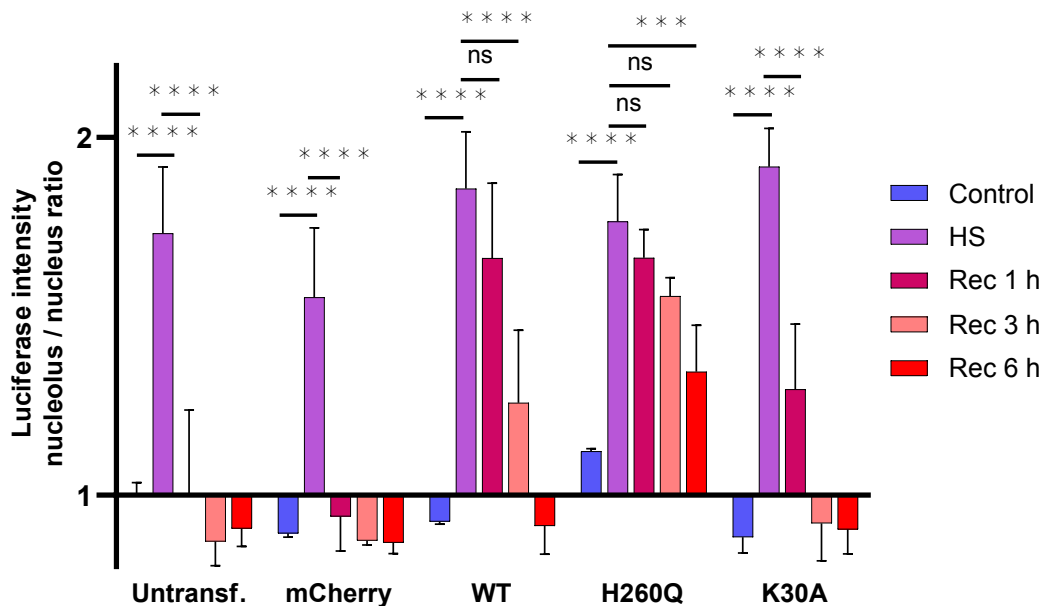

A

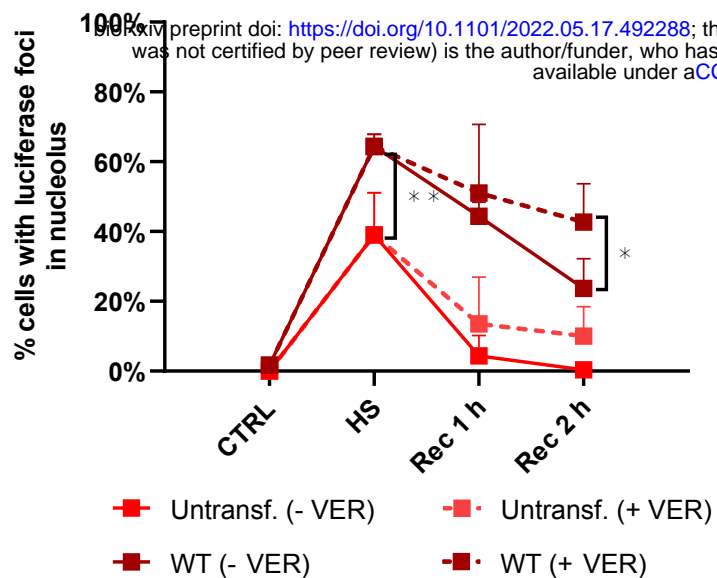

B

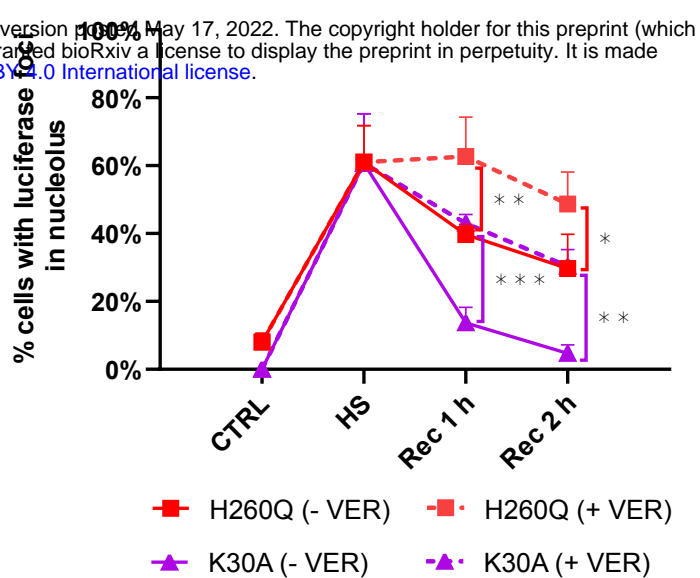

Source: https://www.biorxiv.org/content/10.1101/2022.05.17.492288v1.full.pdf
